Title: Single cell transcriptome profiling of mouse and hESC-derived pancreatic progenitors.

Authors: Nicole A. J. Krentz<sup>1,2,3</sup>, Michelle Lee<sup>1</sup>, Eric E. Xu<sup>1,2</sup>, Shugo Sasaki<sup>1,2</sup>, and Francis C. Lynn<sup>1,2,4</sup>

Affiliations: <sup>1</sup>Diabetes Research Group, BC Children's Hospital Research Institute, Vancouver, BC V5Z 4H4, Canada

<sup>2</sup>Departments of Surgery and Cellular and Physiological Sciences, University of British Columbia, 950 28<sup>th</sup> Avenue West, Vancouver, BC V5Z4H4, Canada

Author List Footnotes:

<sup>3</sup>Twitter: @nkrentz

<sup>4</sup>Twitter: @nictitate

Corresponding author email address: francis.lynn@ubc.ca

## **Summary**

Human embryonic stem cells (hESCs) are a potential unlimited source of insulin-producing  $\beta$ -cells for diabetes treatment. A greater understanding of how  $\beta$ -cells form during embryonic development will improve current hESC differentiation protocols. As  $\beta$ -cells are formed from NEUROG3-expressing endocrine progenitors, this study focused on characterizing the single-cell transcriptomes of mouse and hESC-derived endocrine progenitors. To do this, 7,223 E15.5 and 6,852 E18.5 single cells were isolated from *Neurog3-Cre; Rosa26<sup>mT/mG</sup>* embryos, allowing for enrichment of endocrine progenitors (yellow; tdTomato + EGFP) and endocrine cells (green; EGFP). From a *NEUROG3-2A-eGFP* CyT49 hESC reporter line (N5-5), 4,497 hESC-derived endocrine progenitor cells were sequenced. Differential expression analysis reveals enrichment of markers that are consistent with progenitor, endocrine, or novel cell-state populations. This study characterizes the single-cell transcriptomes of mouse and hESC-derived endocrine progenitors and serves as a resource ([https://lynnlab.shinyapps.io/embryonic\\_pancreas/](https://lynnlab.shinyapps.io/embryonic_pancreas/)) for improving the formation of functional  $\beta$ -like cells from hESCs.

## 1 **Introduction**

2           Diabetes mellitus is a metabolic syndrome characterized by elevated blood  
3 glucose levels that result from reductions in insulin production or action. Insulin is  
4 produced by pancreatic  $\beta$ -cells found within the endocrine islets of Langerhans. A  
5 potential treatment for diabetes is to replace insulin by transplantation of human  
6 embryonic stem cell (hESC)-derived  $\beta$ -cells. Derivation of functional  $\beta$ -cells requires an  
7 in-depth understanding of how endocrine cells form during embryonic development.

8           During mouse and human pancreas development, pancreatic progenitors  
9 become restricted to the endocrine cell fate before differentiating to hormone producing  
10 cells. This process involves many transcription factors (TFs) that drive the changes in  
11 gene expression necessary for endocrine cell genesis. Genetic loss-of-function mouse  
12 studies have found a role of individual TFs in the formation of specific islet cell types.  
13 From this work, a map of the TF cascade that regulates the formation of endocrine cells,  
14 including the  $\beta$ -cells, has emerged (1). However, our understanding of fate decisions  
15 during endocrine cell formation is based on studies looking at the whole population of  
16 progenitors, using technologies such as bulk RNA-sequencing and often only in mouse  
17 cells. The gene expression of individual human and mouse cells during terminal  
18 differentiation is unknown.

19           A promising method to understand gene expression changes at single cell  
20 resolution is single cell RNA-sequencing (scRNA-seq). Following the first publication in  
21 2009 (2), commercial platforms and lower sequencing costs have made scRNA-seq a  
22 feasible technology for many biologists. Recently, several studies have investigated the  
23 single cell transcriptome of healthy and T2D human islets (3-11). From these studies,

24 we have begun to appreciate the cell-type specific gene expression changes that occur  
25 during diabetes progression, the differences between mouse and human islets, and the  
26 identity of novel islet and pancreatic cell types.

27         Additionally, two recent studies have begun characterization of the single cell  
28 transcriptome of mouse and human progenitors during embryonic development. The  
29 first investigated the single cell gene expression of E13.5 embryonic pancreatic cells but  
30 very few endocrine progenitors were sequenced (12). The second performed single cell  
31 qPCR on 500 cells during several stages of hESC differentiation towards  $\beta$ -like cells  
32 (13). In this manuscript, scRNA-seq was used to analyze significantly greater numbers  
33 of cells including: 7,223 E15.5 pancreatic cells, 6,852 E18.5 pancreatic cells and 4,497  
34 hESC-derived endocrine progenitor cells. From these data, novel cell types were  
35 identified and comparisons between hESC-derived endocrine cells and mouse  
36 endocrine progenitors were made. Characterization of these populations will aid efforts  
37 to generate an unlimited source of insulin-producing  $\beta$ -cells for diabetes treatment.

## 38 **Results**

### 39 ***Strategy for generating single cell transcriptomes of embryonic mouse pancreas***

40 To isolate progenitor populations during mouse embryogenesis, two mouse lines  
41 were used: *Neurog3-Cre* and *Rosa26<sup>mTmG</sup>* (Figure 1A). In *Neurog3-Cre; Rosa26<sup>mTmG</sup>*  
42 embryos, all cells are labelled with a membrane-targeted Tomato red fluorescent protein  
43 (tdTomato). Upon activation of the *Neurog3* promoter, Cre recombinase removes the  
44 floxed *tdTomato* cassette, resulting in expression of a membrane-targeted enhanced  
45 green fluorescent protein (eGFP). Therefore, cells that have recently activated *Neurog3*  
46 express both tdTomato and eGFP marking these cells yellow (EP), while cells that are  
47 further along the endocrine cell lineage will express eGFP only (Figure 1A; E) (14). This  
48 strategy was used to FACS isolate the three populations from the pancreas of one  
49 E15.5 and E18.5 embryo and single cell libraries were generated using 10x Genomics  
50 Chromium™ Single Cell 3' Kit. In total, 7,482 E15.5 and 7,012 E18.5 single cells were  
51 sequenced at a depth of >50,000 reads per cell using Illumina NextSeq500.

### 52 ***Identification of cell types in E15.5 and E18.5 pancreas***

53 At E15.5, most cells expressed tdTomato protein only (91.0%). As the yellow  
54 (EP; 7.17%) and green populations (0.19%) were less abundant, these cells were  
55 pooled together and sequenced as one library (Figure 1B). To explore the cell types  
56 present within the E15.5 pancreas, the sequenced red, yellow, and green cells were  
57 aggregated into a single dataset using cellranger aggr and low quality cells were  
58 excluded from analysis using the R pipelines Scater and Seurat (Materials and  
59 Methods). Following this, 7,223 cells were clustered using unsupervised *k*-means  
60 clustering and visualized using t-distributed stochastic neighbor embedding (t-SNE)

61 (15), grouping the cells into 13 individual clusters (Figure 1C). Using the top ten genes  
62 that are specific for each cluster (Supplementary Table 1), the identity of the cells was  
63 inferred. Acinar cells (8.6%) expressed both *Cpa1* and *Cpa2* and duct cells expressed  
64 *Krt19* (6.8%), the gene that encodes for CK19 (Figure 1C). Differential expression  
65 analysis of the bipotent trunk progenitor cells (7.8%) revealed enrichment for trunk  
66 progenitor marker *Sox9* (16,17), *Spp1* (18), *Mt1*, and *Mt2* (Figure 1C & Figure S1). The  
67 endocrine progenitors (EP; 8.3%) expressed *Neurog3*, *Cdkn1a*, *Nkx2-2*, and *Pax4*  
68 (Figure S1) and were closely associated with endocrine cells (11.4%), which expressed  
69 many hormones including *Gcg*, *Ins1*, *Ins2*, *Iapp*, *Pyy*, and *Gast* (Figure 1C & Figure S1).  
70 In addition, there were several rare populations of cells including CD45+ (*Ptprc*) and  
71 F4/80+ (*Emr1*) macrophages ( $\phi$ ; 2.4%), neurons (2.3%), and endothelial cells (1.9%)  
72 (Figure 1C). Finally, most the sequenced cells at E15.5 were found in four clusters of  
73 pancreatic mesenchyme cells (50.0%) (Figure 1C).

74 Next, E18.5 red, green, and yellow single cell libraries were aggregated using  
75 cellranger aggr. After filtering, 6,852 cells were clustered using unsupervised *k*-means  
76 clustering and the identity of the population was inferred based on the top ten  
77 differentially expressed genes (Supplementary Table S2). The most abundant  
78 population consisted of pancreatic mesenchyme cells (22.5%) that segregated into two  
79 distinct clusters of cells (Figure 1D). There were three endocrine lineages that were  
80 named based on gene expression, including alpha-cells ( $\alpha$ ; 17.8%), the beta-cells ( $\beta$ ;  
81 14%), and delta-cells ( $\delta$ ; 8.8%) (Figure 1D). The bipotent trunk progenitor cells (9.6%)  
82 continued to express *Sox9*, *Spp1*, *Mt1* and *Mt2* (Figure 1D & Figure S1). There were  
83 also two immature endocrine cell clusters (Endo; 11.1%) (Figure 1D). While these

84 clusters shared similar gene expression profiles, one (light blue) expressed endocrine  
85 progenitor markers *Neurog3* and *Neurod1*, while the other cluster (teal) expressed  $\beta$ -cell  
86 markers *Ins1*, *Ins2* and *Iapp* (Figure 1D & Figure S1): suggesting differences in  
87 differentiation or lineage. As was seen in the E15.5 embryo, there were endothelial  
88 (6.2%), acinar (3.2%), ductal (3.0%), macrophage ( $\phi$ ; 1.8%), and neuronal cells (1%)  
89 (Figure 1D).

90 To verify the library identity of each individual cell, the GRCm38 genome used for  
91 alignment was annotated to include the sequences for the *tdTomato* and *eGFP*  
92 transgenes. At E15.5 and E18.5, the trunk, acinar, ductal, mesenchymal, endothelial,  
93 neuronal, and macrophage cells expressed *tdTomato*, consistent with the non-  
94 endocrine lineage of these cell types (Figure 1E; F). At E15.5, the endocrine progenitors  
95 (EP) co-expressed both *tdTomato* and *eGFP* (Figure 1E), suggesting recent activation  
96 of *Neurog3*. In addition, a subset of immature endocrine cells (endo) at E18.5 co-  
97 expressed *tdTomato* and *eGFP*, suggesting that these cells were endocrine progenitors  
98 (Figure 1F). As *Neurog3*<sup>+</sup> cells arise from bipotent trunk epithelial progenitor cells, a  
99 subset of the trunk cells expressed *eGFP* at both E15.5 and E18.5 (Figure 1E; F).  
100 Finally, all endocrine cells at E15.5 and E18.5 expressed *eGFP* (Figure 1E; F),  
101 consistent with their derivation from a *Neurog3*<sup>+</sup> endocrine progenitor.

### 102 ***Characterization of the endocrine cell transcriptome in E15.5 pancreas***

103 To understand the transcriptional changes that occur during endocrine  
104 specification, the yellow and green cells were further characterized at E15.5. After  
105 filtering, 1350 cells were analyzed using unsupervised *k*-means clustering and  
106 visualized using a t-SNE plot (Figure 2A). Seven clusters representing several cell

107 populations were identified using the top ten expressed genes (Supplementary Table 3):  
108 endocrine progenitors (EP; 28.7%), alpha-cells ( $\alpha$ ; 26.4%),  $\beta$ -cells ( $\beta$ ; 18.4%), *Chga*-  
109 expressing immature endocrine cells (C; 16.7%), trunk progenitor cells (T; 4.7%),  
110 ghrelin-cells ( $\epsilon$ ; 3.9%), and macrophages ( $\phi$ ; 1.2%). To confirm the identity of these  
111 cells, the expression of several genes was investigated across cell clusters. *Neurog3*  
112 was highly expressed in the EP cluster and in a subset of ghrelin cells, while low level  
113 expression was also found in *Chga*-expressing cells and trunk (Figure 2B & Figure  
114 S2B). *Neurod1*, a target of *Neurog3*, was expressed throughout the endocrine cell  
115 lineage (Figure S2B). The immature endocrine cell cluster expressed both *Chga* and  
116 *Chgb* (Figure S2C; green). Both *Ins1* and *Ins2* were expressed in the  $\beta$ -cells while *Gcg*  
117 and *Ghrl* were specific to the alpha- and ghrelin-cells, respectively (Figure 2B & Figure  
118 S2B).

119 To find cell-type specific markers, the top ten highly expressed genes in the EP  
120 (pink),  $\alpha$ - (yellow) and  $\beta$ -cells (green) cells were profiled (Figure 2C). The EP were  
121 enriched for expression of known marker genes such as *Neurog3*, and *Pax4* along with  
122 novel genes, including *Midkine* (*Mdk*) and *Growth Arrest and DNA Damage Inducible*  
123 *Alpha* (*Gadd45a*) (Figure 2C). The alpha-cells were enriched for expression of *Gcg* and  
124 previously proposed alpha-cell markers *Slc38a5* (12) and *Transthyretin* (*Ttr*) (19). The  
125  $\beta$ -cell cluster expressed several  $\beta$ -cell genes, including *Ins1*, *Ins2*, *Pdx1*, and *lapp*  
126 (Figure 2C & Figure S2B), along with *Neurod1* target *Nnat* (20) and previously identified  
127  $\beta$ -cell marker *Ppp1r1a* (21). Together, these results highlight the utility of single cell  
128 transcriptomics to identify novel markers of cell types.



129 As Neurog3+ progenitor cells exit the cell cycle during differentiation to endocrine  
130 cells (22-24), the cell cycle stage of individual cells at E15.5 was investigated. While the  
131 EP cluster included dividing cells, cells of the endocrine lineage mainly expressed G1  
132 markers, consistent with cell cycle exit (Figure S2A). Interesting, the trunk population of  
133 cells also contained many S- and G2/M-phase cells and had a similar gene expression  
134 profile to the trunk population of cells in E15.5 aggr: *Spp1*, *Mt1*, and *Mt2* (Figure S2C;  
135 blue). The expression of *tdTomato*, *eGFP*, and *Neurog3* (Figure S2B; D) suggests that  
136 the trunk cluster of cells were bipotent progenitor cells that recently activated the  
137 *Neurog3* promoter.

### 138 ***Pseudotime analysis of E15.5 pancreatic cells***

139 Next, Monocle was used to order the E15.5 library in pseudotime (25-27). For  
140 these analyses, the cells previously named as duct, acinar, trunk, EP and endocrine  
141 were used to construct a minimum spanning tree based on their transcriptional  
142 similarities. This unsupervised algorithm generates a differentiation ‘trajectory’ in  
143 pseudotime that models the progression a progenitor cell makes during cell fate  
144 decisions (Figure 3A). The three branches represent the terminal differentiation cell  
145 types of duct (yellow), acinar (red), and endocrine (green) with a cell fate decision point  
146 localized in the center. Along the endocrine lineage, the cells progress through a trunk  
147 (purple) and EP (blue) cell fate before becoming endocrine cells (Figure 3A).  
148 Pseudotime ordering suggests that ductal cells form first from trunk progenitors while  
149 the endocrine cell fate forms later in pseudotime (Figure 3B).

150 The trunk progenitor cells were found along all three branches, suggesting that  
151 trunk cells are already fated towards the endocrine, ductal, or acinar lineage (Figure

152 3A). To understand how these cells differ, a differential gene expression analysis was  
153 performed on the three populations of trunk cells using Seurat. Within the acinar fated  
154 trunk cells, both *Cpa1* and *Cpa2* were among the top ten differentially expressed genes  
155 (Figure S3A). In addition, several cell cycle-dependent genes, such as *Top2a* and  
156 *Hist1h2ap*, were upregulated in the acinar lineage, suggesting that the trunk cells fated  
157 to acinar lineage are actively cycling (Figure S3A). The number of trunk progenitors that  
158 fell along the ductal lineage was the smallest and included ECM genes, *Col3a1*, *Col1a1*,  
159 and *Col1a2* (Figure S3A). Finally, the trunk cells that were part of the endocrine lineage  
160 upregulated expected endocrine cell genes, *Neurog3* and *Cdkn1a* (Figure S3A).

161 To understand the transcriptional changes that occur during differentiation, we  
162 next analyzed the expression of several key genes involved in acinar, ductal and  
163 endocrine cell fates. The acinar marker *Cpa1* was highly expressed early in the acinar  
164 population before declining over pseudotime (Figure 3C). Next, *Sox9* was upregulated  
165 in the trunk progenitor cells before *Krt19* transcription was activated in ductal cells  
166 (Figure 3C). As pseudotime continues to the EP population, *Neurog3* was upregulated  
167 following by a slow increase in the cell cycle inhibitor *Cdkn1a* (Figure 3C). Expression of  
168 *Mdk* and *Gadd45a* mirrored the increase in expression of *Neurog3*, suggesting that  
169 these two genes may be involved in endocrine cell formation (Figure 3C). There was a  
170 gradual increase in *Nkx2-2*, *Nkx6-1*, *Pax4* and *Pax6* over time, consistent with their  
171 known roles in endocrine cell formation, while *Pdx1* was downregulated in the EP  
172 population before upregulation in the endocrine cells (17). Finally, endocrine specific  
173 genes begin to increase in the EP population and were highest at the end of  
174 pseudotime. The pan-endocrine marker *Chga* increased first followed by the *Ghrl*, *Gcg*,

175 *Ins1*, *Ins2*, *Mafb*, and *Sst* (Figure 3C). The sequential upregulation of these genes is  
176 consistent with the developmental order of the formation of endocrine cells (28). Taken  
177 together, these data confirm the progression of individual pancreatic cells during  
178 endocrine cell differentiation and highlights the utility of Monocle.

### 179 **Characterization of endocrine cell population at E18.5**

180 Having examined endocrine cell types at E15.5, we next aimed to characterize  
181 cells of the endocrine lineage at E18.5. To do this, cells from the E18 yellow and E18  
182 green libraries were pooled and filtered using Scater and Seurat pipelines, resulting in  
183 4,177 cells made up of 593 yellow and 3,516 green cells (Table 1). Visualizing this data  
184 using t-SNE revealed 11 clusters: trunk, EP, three  $\beta$ -cell populations, Ghrl cells, alpha-  
185 cells, delta-cells, stellate, S-phase cells, and macrophages (Figure 4A). The trunk, EP,  
186 stellate and macrophage cells were found in the E18.5 yellow library and expressed  
187 *tdTomato* and *eGFP* (Figure 4B; C). Many of the same genes were expressed in E18.5  
188 trunk cells (*Spp1*, *Mt1*, and *Mt2*) while EP expressed *Neurog3*, *Gadd45a*, *Btg2* and  
189 *Pax4* (Figure S4B).

190 The endocrine cells were found within the E18.5 green cell library and expressed  
191 only *eGFP* (Figure 4B; C). Both *Ins1* and *Ins2* were highly expressed in the three  $\beta$ -cell  
192 populations,  $\beta$ 1,  $\beta$ 2, and  $\beta$ 3, as well as in the S-phase cells (Figure 4D-E), consistent  
193 with the start of the wave of replication that is required for  $\beta$ -cell function (29).  
194 Differential expression analyses of the  $\beta$ -cell populations reveal cluster-specific  
195 differences in gene expression (Supplementary Table S4). The top ten differentially  
196 expressed genes in the  $\beta$ 1 cluster included maturity markers *Ins1*, *Ins2*, *G6pc2*, and  
197 *Slc2a2*, while the  $\beta$ 2 cluster was a *Mafb*-expressing immature cell state (Figure S4A).

198 The S-phase cells expressed high levels of *Ins1*, *Ins2*, and *Gcg* suggesting this cluster  
199 represents a mixture of alpha- and  $\beta$ -cells (Figure 4D; E; I). Differential gene expression  
200 revealed that the S-phase cluster expressed markers of DNA replication, *Top2a* and  
201 *Cdk1* (Figure S4A; purple). *Sst* expression was upregulated in the delta cell population  
202 and in a subset of the  $\beta$ 3 population (Figure 4F). None of the clusters showed specific  
203 upregulation of *Ppy* but some alpha, delta and  $\beta$ 3 had high *Ppy* expression (Figure 4G).  
204 *Ghrl* was upregulated in the Ghrl cluster (Figure 4H) while *Gcg* was highly expressed in  
205 the alpha-cell cluster (Figure 4I).

206 To further investigate the heterogeneity of embryonic endocrine cells, the E18.5  
207 green library was studied. Following filtering, 3,516 cells were visualized using t-SNE  
208 plots and the following cell types were identified based on gene expression  
209 (Supplementary Table 5): trunk, alpha ( $\alpha$ ), Ghrl, PP, delta ( $\delta$ ), S-phase cells (S), mitotic  
210 cells (M), and two  $\beta$ -cell populations ( $\beta$ 1 and  $\beta$ 2) (Figure 5A). To confirm these cell  
211 identities, the expression of endocrine hormones was determined in single cells. Both  
212 *Ins1* and *Ins2* were found in the cells of  $\beta$ 1,  $\beta$ 2, S, and M clusters, while *Gcg* expression  
213 was specific to the  $\alpha$  cell populations (Figure S5B). The  $\delta$ -cell cluster expressed *Sst* and  
214 *Hhex* (Figure S5B; C). The Ghrl cells expressed *Ghrl* and PP cells contained *Ppy*  
215 transcripts (Figure S5B). Many of the differentially expressed genes for the  $\alpha$ -cell  
216 lineage were also expressed in the Ghrl and PP clusters (Figure S4C).

217 To understand the heterogeneity within the  $\beta$ -cell populations the expression of  
218 the top ten genes for  $\beta$ 1 (pink),  $\beta$ 2 (green), M (purple), and S cells (pink) was  
219 determined (Figure 5C). Most these cells were in the  $\beta$  cluster and expressed genes  
220 involved in glucose metabolism including *Slc2a2* and *G6pc2* and expressed high levels

221 of *Ins1* and *Ins2* (Figure 5C). The top ten differentially expressed genes of the  $\beta$ 2 cluster  
222 included progenitor markers *Pdx1*, *Mafb*, *Cryba2*, *Nkx6-1* and *Gadd45a*, suggesting  
223 they may be an immature  $\beta$ -cell population (Figure 5C). The other *Ins*-expressing cells  
224 are located within the S- and M-phase clusters. The S cluster expressed genes specific  
225 to the S phase, such as *Cdk1*, *Topa2*, suggesting these cells represent a small (1%)  
226 population of  $\beta$ -cells undergoing DNA replication (Figure 5C & Figure S5A). In the M  
227 cluster (2.5%), the cells expressed the G2/M gene *Ccnb1*, the histone genes *Hist1h2bc*,  
228 *Hist1h1c*, *H2af2*, and the kinetochore protein *Spc25*, suggesting that these cells are  
229 undergoing mitosis (Figure 5C & Figure S5A). To confirm the identity of these clusters,  
230 the cell cycle phase of individual cells in the E18.5 green library was determined using  
231 Seurat. The S-phase cluster contained both S- and G2/M-phase cells, while the M  
232 cluster had mainly G2/M-phase cells (Figure S5A).

233         Previously studies in adult  $\beta$ -cells suggest proliferation is accompanied by a  
234 decrease in the function and maturation of  $\beta$ -cells (30,31). To understand if a similar  
235 process occurs during mouse  $\beta$ -cell development, we profiled the expression of several  
236  $\beta$ -cell maturity and progenitor markers in the  $\beta$ 1,  $\beta$ 2, S and M phase populations of cells  
237 (Figure 5B). The  $\beta$ 2 cluster contained a subset of cells with lower *Ins1*, *Ins2*, *Slc2a2*,  
238 *G6pc2*, and *Npy*, consistent with the immature state of these cells (Figure 5B). In  
239 addition, this cluster showed an upregulation of genes associated with an immature cell  
240 state: *Nkx6-1*, *Pdx1*, *Mafb*, and *Gadd45a* (Figure 5B). Interestingly, the cells of the S  
241 and M cluster exhibit a similar gene expression profile as the  $\beta$ 1 cluster, suggesting that  
242 in the embryonic state proliferation does not reduce maturation (Figure 5B).

243 ***Single cell transcriptome of NEUROG3-lineage during hESC differentiation***

244 To profile the transcriptome of human endocrine progenitors, a CyT49  
245 *NEUROG3-2A-eGFP* hESC reporter line (N5-5) was used (32). N5-5 cells were  
246 differentiated using Rezania *et al.* protocol (33) and collected for scRNA-seq before the  
247 transition to stage 6 (S6D1) during which the differentiated cells are similar to immature  
248 endocrine cells. After filtering, 4,497 GFP+ cells were visualized using t-SNE, revealing  
249 nine clusters (Figure 6A). These clusters can be classified as five cell types based on  
250 gene expression: endocrine progenitors (EP; 40%), polyhormonal endocrine (Endo;  
251 42.3%), duct (5.7%), liver (8.6%), and an unknown cell type (4.6%) (Figure 6A).

252 Further examination of the expression of endocrine specific genes supported  
253 these cell classifications. While all cells expressed GFP protein, only a few cells  
254 localized to the EP cluster and expressed *NEUROG3* transcript (Figure 6B). *NEUROD1*,  
255 a direct target of *NEUROG3* (34), was widely expressed throughout the EP and  
256 endocrine clusters (Figure 6B). Interestingly, *CDKN1A*, the downstream target of  
257 *NEUROG3* that reinforces cell cycle exit during murine endocrine cell differentiation  
258 (22), is not abundantly expressed in hESC-derived endocrine progenitors or endocrine  
259 cells (Figure 6B). To understand how the three EP clusters differ, the top ten genes that  
260 are specific for each individual cluster was determined. The largest EP cluster (EP1)  
261 expressed *GHRL*, a gene that marks a multipotent progenitor that can give rise to alpha,  
262 PP, and rare  $\beta$ -cells in the mouse (35) (Figure 6C). EP2 contains genes that are  
263 associated with serotonin production, including *TPH1* and *FEV* (36) (Figure 6C). In EP3,  
264 the *GAST* gene is upregulated, consistent with previous reports of *GAST* induction in  
265 *INS*+ cells during hESC differentiation (37) (Figure 6C).

266 The endocrine cell population was made up of hormone+ cells, many of which  
267 co-expressed multiple hormones including *GCG*, *SST*, and *INS* (Figure 6B). Of the  
268 three hormones, *INS* was the most abundantly expressed and can be detected in EP  
269 and endocrine cells (Figure 6B). Differential gene expression analysis between the  
270 three endocrine clusters revealed an enrichment of  $\beta$ -cell genes *ERO1B* (38), *SLC30A8*  
271 (39), and *NPY* (40) in Endo1, suggesting these cells are differentiating  $\beta$ -cells (Figure  
272 6D). The Endo2 cluster appeared fated towards the alpha-cell based on expression of  
273 *GCG*, *PEMT* (10), and *IRX2*, while the expression of *SST* and *HHEX* in Endo3 is  
274 suggestive of the delta-cell fate (Figure 6D).

### 275 **Comparison of mouse and hESC-derived endocrine cells**

276 To understand the “developmental age” of hESC-derived endocrine cells, the  
277 single cell transcriptome of S6D1 GFP+ cells was compared to mouse endocrine cells.  
278 To do this, all cells of the E15.5 yellow and green library (Figure 2A) and hESC library  
279 (Figure 6A) were merged into one dataset, unsupervised clustering was performed, and  
280 visualized using a tSNE plot revealing ten clusters (Figure 7A). Using the original  
281 identities of the E15.5 yellow and green cells (Figure 2A), the EP, *Chga*-expressing  
282 immature endocrine cells, alpha and  $\beta$ -cells clusters were labelled (Figure 7A). These  
283 clusters contained a mixture of mouse and human cells, with human cells representing  
284 83%, 70%, 78% and 12% of the *Chga*, Alpha, Beta, and EP cells, respectively (Figure  
285 7B). While the mouse cells were evenly split among the four clusters, the human cells  
286 mainly clustered within the *Chga* cell type (45%) and very few (1%) were identified as  
287 EP cells (Figure 7C). Together, these data suggest that the hESC-derived cells are  
288 most like E15.5 *Chga*-expressing immature endocrine cells.

289           To investigate whether the hESC-derived cells are similar to later developing  
290 endocrine cell types, the single cell transcriptome was compared to E18.5 green  
291 endocrine cells. To do this, all cells of the E18.5 green library (Figure 4A) and hESC  
292 library (Figure 6A) were merged into one dataset, unsupervised clustering was  
293 performed, and visualized using a tSNE plot revealing 13 clusters (Figure 7D). Using  
294 the endocrine cell identities of E18.5 green cells (Figure 6A), four clusters were  
295 identified as alpha cells, delta cells, immature  $\beta$ -cells ( $\beta$ 2) and mature  $\beta$ -cells ( $\beta$ 1).  
296 Human cells made up 47%, 39%, 32%, and 5% of the  $\beta$ 1, delta,  $\beta$ 2, and alpha cell  
297 clusters, respectively (Figure 7E). Of the human cells, most cells were part of the  $\beta$ 1  
298 and delta clusters, suggesting that that hESC-derived cells are most similar to the E18.5  
299 mature  $\beta$ - and delta cells (Figure 7F).



## 300 **Discussion**

301           Single cell RNA-sequencing allows for the identification of novel cell types,  
302 discovery of cell state specific genes, and the appreciation of cellular heterogeneity  
303 within a population. Here, scRNA-seq was used to generate a resource of single cell  
304 transcriptomes from 7,223 E15.5 embryonic pancreatic cells, 6,852 E18.5 embryonic  
305 pancreatic cells, and 4,497 hESC-derived *NEUROG3-2A-eGFP* cells. Several unique  
306 observations were made including the presence of macrophage cells during embryonic  
307 pancreas development, novel genes that may regulate endocrine cell formation, and  
308 previously unidentified populations of cells generated in hESC differentiations. This data  
309 is publically available online ([https://lynnlab.shinyapps.io/embryonic\\_pancreas](https://lynnlab.shinyapps.io/embryonic_pancreas)) and will  
310 serve as a resource to quickly determine the single cell expression of a particular gene  
311 in embryonic pancreas.

312           There were 175 and 122 macrophage cells in E15.5 and E18.5 embryonic  
313 pancreas, respectively. Macrophages are found in many tissues during development  
314 and play important roles in tissue remodeling (41). During mammary gland  
315 development, F4/80+ macrophage cells are found localized to the highly proliferative  
316 epithelial structures and are required for proper gland development (42). Using a  
317 genetic mouse model that is deficient in macrophages (*Csf1<sup>op/op</sup>*), macrophages were  
318 shown to play an important role in the formation of the epithelial tree during mammary  
319 gland development, a defect that can be rescued by restoring the macrophage  
320 population. The role of macrophages in the growth of epithelial organs appears to be  
321 mostly indirect, either by facilitating the clearance of apoptotic cells (43) or remodeling

322 of extracellular matrices (44). In mouse pancreas development, macrophages are  
323 present as early as E12.5 (45,46).

324 However, the presence of macrophages in the Neurog3 endocrine lineage is a  
325 novel finding. This may represent a previously unidentified developmental source of  
326 macrophages or, more likely, it results from the phagocytosis of nascent endocrine cells  
327 by macrophages, which is a previously unappreciated occurrence. Whatever the  
328 developmental source, macrophages play an important role in  $\beta$ -cell maturation as  
329 *Csf1<sup>op/op</sup>* mice have reduced  $\beta$ -cell mass due to decreased  $\beta$ -cell proliferation in late  
330 embryogenesis (46). Consistently, treating pancreatic explants with M-CSF increased  
331 the number of insulin+ cells, which is thought to be via the differentiation/activation of  
332 macrophage precursors (45). Taken together, this study confirms the presence of  
333 macrophages in embryonic pancreas and is consistent with a phagocytic role of  
334 macrophages during embryonic development.

335 Comparison of E15.5 and E18.5 endocrine progenitor cells resulted in a list of  
336 genes that are upregulated in endocrine progenitors. These include *Btg2* and *Gadd45a*,  
337 both of which are involved in cell cycle regulation and have been implicated in neural  
338 development. *Gadd45* genes are involved in tissue development via their role in cell  
339 cycle exit and DNA demethylation (47). Pro-neural proteins, such as Neurog2, NeuroD,  
340 and *Ascl1*, have been shown to activate expression of *Gadd45g* (48,49). This leads to  
341 *Gadd45*-dependent cell cycle exit by upregulation of cell cycle inhibitor *Cdkn1a* (50) and  
342 direct interaction with Cdk1/CyclinB (51), as has been shown in *Xenopus* embryos for  
343 both *Gadd45a* and *Gadd45g* (52). In addition, studies in mice implicate *Gadd45b* in  
344 reducing proliferation of neural precursors and DNA demethylation of promoters

345 involved in adult neurogenesis (53). While Gadd45 proteins are implicated in pancreatic  
346 cancer (50), their role in pancreas development has not been investigated. The  
347 expression of *Gadd45a* in Neurog3+ endocrine progenitor cells suggest that it may play  
348 a role, along with *Cdkn1a*, in regulating cell cycle exit. Future studies will explore the  
349 potential role of Gadd45a in DNA demethylation of endocrine-specific promoters during  
350 pancreatic endocrine genesis

351 *Btg2*, also known as *Tis21*, is a negative regulator of the cell cycle that inhibits  
352 transcription of *CyclinD1*, preventing the G1-S transition (54,55). Deletion of *Btg2* in the  
353 adult dentate gyrus shortens G1 length in progenitor cells and prevents their terminal  
354 differentiation (56). This is thought to be caused in part by the direct binding of Btg2 to  
355 *Id3* promoter. Id proteins bind E proteins, which are obligate heterodimerization partners  
356 of bHLH TFs like Neurog3. By sequestering E proteins and preventing their association  
357 with pro-neural bHLH TFs, Id acts to prevent terminal differentiation (57). It will be  
358 interesting to investigate the role of Btg2 in pancreas development. Based on literature  
359 from neurogenesis, Btg2 may also act to inhibit *Id3* transcription, allowing for the  
360 activation of pro-endocrine genes, including *Neurog3*.

361 Understanding  $\beta$ -cell maturation, a process that is thought to occur postnatally, is  
362 a key goal in regenerative medicine approaches for diabetes treatment. Postnatal  $\beta$ -  
363 cells are functionally immature due to a high basal insulin secretion and reduced  
364 glucose stimulated insulin secretion (58-60). This is due to reduced expression of key  
365 metabolic genes and a reduced sensitivity of ATP-sensitive K<sup>+</sup> channel to glucose  
366 (59,61). Recently, a single cell transcriptome study of postnatal  $\beta$ -cells identified an  
367 immature, proliferating phenotype that was marked by high expression of mitochondrial

368 and amino acid metabolism genes (3). Studies on both rat and human postnatal  $\beta$ -cells  
369 suggest that maturation of  $\beta$ -cell function, i.e. glucose stimulated insulin release, occurs  
370 postnatally (62,63) and this is concomitant with a decline in  $\beta$ -cell proliferation.  
371 Furthermore, when adult  $\beta$ -cells are induced to proliferate, they resemble functionally  
372 immature neonatal cells (30), suggesting that proliferation of  $\beta$ -cells leads to a decline in  
373 function. However, in embryonic proliferating  $\beta$ -cells we did not detect significant  
374 changes in gene expression that suggests a defect in function, likely owing to the  
375 immature state of embryonic  $\beta$ -cells. Future studies investigating the single cell  
376 transcriptome of maturing, postnatal  $\beta$ -cells may provide insights into how  $\beta$ -cell function  
377 develops.

378         The liver, like the pancreas, is derived from the foregut endoderm. The region of  
379 the endoderm that gives rise to the liver can also form the ventral pancreas (64). One of  
380 the factors that controls the decision between liver and pancreas is the secretion of  
381 FGFs by the cardiac mesoderm that permits the formation of liver, while preventing  
382 ventral pancreas formation (65). The similar developmental origin of the pancreas and  
383 the liver makes the unintended generation of liver cells during hESC differentiations  
384 towards pancreas likely. However, finding liver cells downstream of *NEUROG3* is  
385 surprising. It is possible that, like in the mouse, a small population of hESC-derived  
386 pancreatic endoderm cells have low transcription of *NEUROG3* that is not sufficient to  
387 induce the endocrine lineage. Using a *NEUROG3* lineage tracing hESC line, it would be  
388 interesting to investigate the plasticity of cells that activate *NEUROG3* transcription. Our  
389 previous studies suggest that *NEUROG3* protein in hESC differentiations is  
390 hyperphosphorylated (Nicole Krentz and Francis Lynn unpublished results), likely

391 resulting in rapid degradation. Efforts to stabilize NEUROG3 protein may prevent the  
392 unintended formation of other endodermal cell types, including liver cells.

393 In conclusion, the single cell transcriptome of mouse pancreatic progenitors,  
394 endocrine progenitors, and endocrine cells at E15.5 and E18.5 as well as *NEUROG3*-  
395 expressing cells derived from hESCs was characterized. These data are a resource for  
396 developmental biologists interested in studying heterogeneity in the developing mouse  
397 pancreas and for stem cell researchers aiming to improve the current differentiation  
398 protocols for generating  $\beta$ -like cells.

## 399 **Experimental Procedures**

### 400 ***Animals***

401 Mice were housed on a 12-hour light-dark cycle in a climate-controlled  
402 environment according to protocols approved by the University of British Columbia  
403 Animal Care Committee. *Rosa26<sup>mT/mG</sup>* (Stock No: 007576) (66) and *Neurog3-Cre* (Stock  
404 No: 005667) mice were purchased from Jackson Laboratory.

### 405 ***Maintenance and in vitro differentiation of pluripotent cells***

406 Previously, a *NEUROG3-2A-eGFP* (N5-5) reporter hESC line was generated (32)  
407 from CyT49 parental hESC line (ViaCyte, Inc. San Diego CA). Undifferentiated cells  
408 were maintained on diluted Geltrex-coated (ThermoFisher Scientific; 1:100 in  
409 DMEM/F12) plates in 10/10 media [DMEM/F12, 10% XenoFree KnockOut™ Serum  
410 Replacement (ThermoFisher Scientific), 1x MEM non-essential amino acids  
411 (ThermoFisher Scientific), 1x Glutamax, 1x penicillin/streptomycin, 10 nM β-  
412 mercaptoethanol (Sigma-Aldrich), supplemented with 10 ng/mL ACTIVIN A (E-  
413 biosciences) and 10 ng/mL HEREGULIN-β1 (Peprotech)] (67,68). Cells were split every  
414 three or four days and plated at a density of 1x10<sup>6</sup> per 60 mm plate.

415 For differentiation, N5-5 hESCs were plated onto Geltrex-coated 12-well plates at  
416 a density of 5 x10<sup>5</sup> in 10/10 media. Differentiations began 48 hours post-seeding using a  
417 modified version of Rezania *et al* (33). Briefly, cells were rinsed with 1 x PBS and then  
418 basal culture media (MCDB 131 medium (USBiological Life Sciences), 1.5 g/L sodium  
419 bicarbonate (Sigma-Aldrich), 1 x Glutamax (ThermoFisher Scientific), 1 x P/S  
420 (ThermoFisher Scientific)) with 10 mM final glucose (Sigma-Aldrich), 0.5% BSA (Sigma-  
421 Aldrich), 100 ng/mL ACTIVIN A, and 3 μM of CHIR-99021 (Sigma-Aldrich) was added

422 for 1 day only. For the following two days, cells were treated with the same media  
423 without CHIR-99021 compound to generate definitive endoderm (Stage 1). On day four,  
424 cells were cultured in basal media with 0.5% BSA, 10 mM glucose, 0.25 mM ascorbate  
425 (Sigma-Aldrich) and 50 ng/mL of KGF (R&D or StemCell Technologies) for 2 days to  
426 generate primitive gut tube (Stage 2). To produce posterior foregut (Stage 3), cells were  
427 treated for three days with basal media with 10 mM final glucose concentration, 2%  
428 BSA, 0.25 mM ascorbate, 50 ng/mL of KGF, 0.25  $\mu$ M SANT-1 (Tocris Biosciences), 1  
429  $\mu$ M retinoic acid (Sigma-Aldrich), 100 nM LDN193189 (EMD Millipore), 1:200 ITS-X, and  
430 200 nM  $\alpha$ -Amyloid Precursor Protein Modulator (APPM; EMD Millipore). For stage 4,  
431 cells were treated with basal media with 10 mM glucose, 2% BSA, 0.25 mM ascorbic  
432 acid, 2 ng/mL of KGF, 0.25  $\mu$ M SANT-1, 0.1  $\mu$ M retinoic acid, 200 nM LDN193189,  
433 1:200 ITS-X, and 100 nM APPM for 3 days to generate pancreatic progenitors. Cells  
434 were maintained as planar cultures and media was changed to basal media with 20 mM  
435 glucose, 2% BSA, 0.25  $\mu$ M SANT-1, 0.05  $\mu$ M retinoic acid, 100 nM LDN193189, 1:200  
436 ITS-X, 1  $\mu$ M T3 (Sigma-Aldrich), 10  $\mu$ M Repsox (Sigma-Aldrich), and 10  $\mu$ M zinc sulfate  
437 (Sigma-Aldrich) for 3 days to generate pancreatic endocrine precursors (Stage 5).

#### 438 ***Preparing cells for single cell RNA-sequencing***

439 For mouse studies, *Neurog3-Cre; Rosa26<sup>mTmG</sup>* embryos were collected on E15.5  
440 and E18.5 and dissected on ice. To generate single cells, embryonic pancreases were  
441 incubated in 2 mL of pre-warmed 37°C 0.25% Trypsin with mild agitation for 8 or 20  
442 minutes for E15.5 and E18.5 pancreases, respectively. To stop digestion, 1 mL of cold  
443 FBS and 2 mL of cold PBS were added and mixed by inversion to stop digestion,  
444 followed by pipette filtering with a 40  $\mu$ m nylon filter. Cells were then centrifuged at 4°C

445 for 5 minutes at 200 xg. After aspirating the supernatant, cells were resuspended in cold  
446 2% FBS in PBS, placed on ice, and immediately sorted into tdTomato+,  
447 tdTomato+eGFP+ (yellow), and eGFP+ fractions using a Beckman Coulter MoFlo  
448 Astrios (Mississauga, ON, Canada) into 20% FBS in PBS.

449 For hESC studies, N5-5 cells were differentiated and collected following three  
450 days at stage 5 (S6D1). Cells were washed once with PBS before 500  $\mu$ L of Accutase  
451 was added per well of a 12-well plate. Following 5 minutes at 37°C, 500  $\mu$ L of 2% BSA  
452 MCDB media was added to each well and cells were transferred to a 15 mL conical  
453 tube. Cells were centrifuged for 5 minutes at 200 xg, washed once with PBS, and  
454 resuspended in 350  $\mu$ L of ice cold PBS. GFP+ cells were sorted into stage 5 media with  
455 10  $\mu$ M Y-27632 dihydrochloride using a Beckman Coulter MoFlo Astrios.

#### 456 ***Generating scRNA-seq libraries***

457 The 10x Genomics Chromium<sup>TM</sup> controller and Single Cell 3' Reagent Kits v2  
458 (Pleasanton, CA, USA) were used to generate single cell libraries. Briefly, cells were  
459 counted following FACS and cell suspensions were loaded for a targeted cell recovery  
460 of 3000 cells per channel. The microfluidics platform was used to barcode single cells  
461 using Gel Bead-In-Emulsions (GEMs). RT is performed within GEMs, resulting in  
462 barcoded cDNA from single cells. The full length, barcoded cDNA is PCR amplified  
463 followed by enzymatic fragmentation and SPRI double sided size selection for optimal  
464 cDNA size. End repair, A-tailing, Adaptor Ligation, and PCR are performed to generate  
465 the final libraries that have P5 and P7 primers compatible with Illumina sequencing. The  
466 libraries were pooled and sequenced using an Illumina NextSeq500 platform with a 150



467 cycle High Output v2 kit in paired-end format with 26 bp Read 1, 8 bp I5 Index, and 85  
468 bp Read 2.

### 469 ***Data Analyses***

470 Following sequencing, data were analyzed using publically available software  
471 programs and R pipelines. First, cellranger mkfastq (10x Genomics) generates FASTQ  
472 files from the raw sequencing data, storing the nucleotide sequence and its  
473 corresponding quality score in a text-based format for further analysis. Next, cellranger  
474 count uses the FASTQ file to perform sequence alignment (mouse: GRCm38 and  
475 human: GRCh38), filter sequences based on quality score, and generate single cell  
476 gene counts. As an optional step, cellranger aggr can be used to combine data from  
477 multiple samples. This was used to merge all E15.5 and E18.5 libraries into E15.5 total  
478 cells and E18.5 total cells datasets, respectively.

479 As minimal filtering is performed in cellranger, two additional R pipelines were  
480 used to filter out cells that did not meet the quality control standard. The first pipeline is  
481 called Scater (<https://bioconductor.org/packages/release/bioc/html/scater.html>) and is a  
482 single cell analysis pipeline that places a great emphasis on quality control (69). Scater  
483 discards cells based on the total number of expressed genes, removing potential  
484 doublets and debris, and removes low-abundance genes or genes with high dropout  
485 rate based on expression level. For this analysis, cells were discarded based on counts  
486 (transcripts/gene) or genes (genes/cell) greater than 3 standard deviation away from the  
487 mean. This QC dataset was then analyzed using the Seurat V2.0 pipeline  
488 (<http://satijalab.org/seurat/>), another R toolkit for single cell genomics (70). Seurat was  
489 used to remove common sources of variation including number of genes (each cell must

490 express a minimum of 500 genes), number of counts (each gene must be expressed in  
491 a minimum of three cells), and cell cycle phase. Finally, unsupervised *k*-means  
492 clustering was performed using Seurat to group cells based on gene expression and to  
493 identify unique cell types within the populations.

#### 494 ***Identification of cell cycle phase***

495 To identify the cell cycle stage of individual cells, each cell was assigned a score  
496 based on expression of G2/M and S phase markers using Seurat v2.0. From this score,  
497 a cell is classified as either G1-phase (expressing neither G2/M or S phase markers), S-  
498 phase (expressing only S markers), or G2/M-phase (expressing only G2/M markers).  
499 This data can then be used to regress out the cell cycle phase as a source of  
500 heterogeneity.

#### 501 ***Pseudotime analysis***

502 Pseudotime analysis was performed using Monocle v2.6.1 ([http://cole-trapnell-  
503 lab.github.io/monocle-release/docs/#constructing-single-cell-trajectories](http://cole-trapnell-lab.github.io/monocle-release/docs/#constructing-single-cell-trajectories)). Transcript  
504 data that was quality controlled using Scater was loaded into Monocle as a CellDataSet  
505 object. Variable expressed genes was defined as a gene that was expressed in >50  
506 cells. Unsupervised clustering was performed using genes that have a mean expression  
507 of  $\geq 0.1$  and dimensional reduction was done using tSNE. Next, differential gene  
508 expression analysis was done between clusters of interest and the top 1000 variable  
509 genes were used to order cells in the pseudotime.

#### 510 **Author Contributions**

511 Conceptualization, N.A.J.K., E.E.X, S.S. and F.C.L.; Methodology and Investigation,  
512 N.A.J.K., E.E.X., M.L., S.S., and F.C.L. Writing, N.A.J.K. and F.C.L.; Funding

513 Acquisition, F.C.L.

514 **Acknowledgements**

515 This work was supported by operating grants to F.C.L.: Stem Cell Network (DT3 and  
516 DT4), Canadian Foundation for Innovation (#33644). Salary (F.C.L.) was supported by  
517 the Michael Smith Foundation for Health Research (#5238 BIOM), the Canadian  
518 Diabetes Association, and the BC Children's Hospital Research Institute. Fellowship  
519 support was provided by the CIHR-BC Transplantation Trainee Program, the BC  
520 Children's Hospital Research Institute, UBC, and the National Science and Engineering  
521 Research Council of Canada PGSD2-475838 (N.A.J.K.). We thank members of the  
522 Lynn lab for technical support, discussion, and critical reading of the manuscript.  
523 Training on the 10X genomics platform was provided by Jens Durruthy (10X Genomics).

## References

1. Cano DA, Soria B, Martín F, Rojas A. Transcriptional control of mammalian pancreas organogenesis. *Cell Mol Life Sci*. 2013 Nov 13;71(13):2383–402.
2. Tang F, Barbacioru C, Wang Y, Nordman E, Lee C, Xu N, et al. mRNA-Seq whole-transcriptome analysis of a single cell. *Nat Meth*. 2009 Apr 6;6(5):377–82.
3. Zeng C, Mulas F, Sui Y, Guan T, Miller N, Tan Y, et al. Pseudotemporal Ordering of Single Cells Reveals Metabolic Control of Postnatal Beta Cell Proliferation. *Cell Metabolism*. 2017 May 2;25(5):1160-75.
4. Qiu W-L, Zhang Y-W, Feng Y, Li L-C, Yang L, Xu C-R. Deciphering Pancreatic Islet Beta Cell and Alpha Cell Maturation Pathways and Characteristic Features at the Single-Cell Level. *Cell Metabolism*. 2017 May 2;25(5):1194-1205.
5. Enge M, Arda HE, Mignardi M, Beausang J, Bottino R, Kim SK, Quake SR. Single-Cell Analysis of Human Pancreas Reveals Transcriptional Signatures of Aging and Somatic Mutation Patterns. *Cell*; 2017 Oct 5;171(2):321-330.
6. Wang YJ, Schug J, Won K-J, Liu C, Najj A, Avrahami D, Golson ML, Kaestner KH. Single cell transcriptomics of the human endocrine pancreas. *Diabetes*. 2016 Oct;65(10):3028-38.
7. Lawlor N, George J, Bolisetty M, Kursawe R, Sun L, Sivakamasundari V, Kycia I, Robson P, Stitzel ML. Single-cell transcriptomes identify human islet cell signatures and reveal cell-type-specific expression changes in type 2 diabetes. *Genome Research*. 2017 Feb;27(2):208–22.
8. Chu L-F, Leng N, Zhang J, Hou Z, Mamott D, Vereide DT, Choi J, Kendzioriski C, Stewart R, Thomson JA. Single-cell RNA-seq reveals novel regulators of human embryonic stem cell differentiation to definitive endoderm. *Genome Biol*. 2016 Aug 17;17(1):173.
9. Xin Y, Kim J, Ni M, Wei Y, Okamoto H, Lee J, Adler C, Cavino K, Murphy AJ, Yancopoulos GD, Lin HC, Gromada J. Use of the Fluidigm C1 platform for RNA sequencing of single mouse pancreatic islet cells. *Proc Natl Acad Sci U S A*. 2016 Mar 22;113(12):3293–8.
10. Segerstolpe Å, Palasantza A, Eliasson P, Andersson E-M, Andréasson A-C, Sun X, Picelli S, Sabish A, Clausen M, Bjursell MK, Smith DM, Kasper M, Ämmälä C, Sandberg R. Single-Cell Transcriptome Profiling of Human Pancreatic Islets in Health and Type 2 Diabetes. *Cell Metabolism*. 2016 Oct 11;24(4):593–607.
11. Baron M, Veres A, Wolock SL, Faust AL, Gaujoux R, Vetere A, Ryu JH, Wagner BK, Shen-Orr SS, Klein AM, Melton DA, Yanai I. A Single-Cell Transcriptomic Map of the Human and Mouse Pancreas Reveals Inter- and Intra-cell Population Structure. *Cell Systems*. 2016 Oct 26;3(4):346–360.e4.
12. Stanescu DE, Yu R, Won K-J, Stoffers DA. Single cell transcriptomic profiling of mouse pancreatic progenitors. *Physiol Genomics*. 2017 Feb 14;49(2):105–14.
13. Petersen MBK, Azad A, Ingvorsen C, Hess K, Hansson M, Grapin-Botton A, Honoré. Single-Cell Gene Expression Analysis of a Human ESC Model of Pancreatic Endocrine Development Reveals Different Paths to Beta-Cell Differentiation. *Stem Cell Reports*. 2017 Oct 10;9(4):1246-61.
14. Xu EE, Krentz NAJ, Tan S, Chow SZ, Tang M, Nian C, Lynn FC. SOX4 cooperates with neurogenin 3 to regulate endocrine pancreas formation in mouse

- models. *Diabetologia*. 2015 May;58(5):1013–23.
15. van der Maaten L, Hinton G. Visualizing Data using t-SNE. *Journal of Machine Learning Research*. 2008 Nov 8;9:2579–605.
  16. Seymour PA, Freude KK, Tran MN, Mayes EE, Jensen J, Kist R, Scherer G, Sander M. SOX9 is required for maintenance of the pancreatic progenitor cell pool. *Proc Natl Acad Sci U S A*. 2007 Feb 6;104(6):1865–70.
  17. Lynn FC, Smith SB, Wilson ME, Yang KY, Nekrep N, German MS. Sox9 coordinates a transcriptional network in pancreatic progenitor cells. *Proc Natl Acad Sci U S A*. 2007 Jun 19;104(25):10500–5.
  18. Kilic G, Wang J, Sosa-Pineda B. Osteopontin is a novel marker of pancreatic ductal tissues and of undifferentiated pancreatic precursors in mice. *Dev Dyn*. 2006;235(6):1659–67.
  19. Westermark GT, Westermark P. Transthyretin and Amyloid in the Islets of Langerhans in Type-2 Diabetes. *Experimental Diabetes Research*. 2008;2008:429274.
  20. Chu K, Tsai MJ. Neuronatin, a downstream target of BETA2/NeuroD1 in the pancreas, is involved in glucose-mediated insulin secretion. *Diabetes*. 2005 Apr;54(4):1064–73.
  21. Martens GA, Jiang L, Hellems KH, Stangé G, Heimberg H, Nielsen FC, Sand O, Van Helden J, Gorus FK, Pipeleers DG. Clusters of Conserved Beta Cell Marker Genes for Assessment of Beta Cell Phenotype. *PLoS ONE*. 2011;6(9):e24134–15.
  22. Miyatsuka T, Kosaka Y, Kim H, German MS. Neurogenin3 inhibits proliferation in endocrine progenitors by inducing Cdkn1a. *Proc Natl Acad Sci U S A*; 2011 Jan 4;108(1):185–90.
  23. Jensen J, Heller R, Funder-Nielsen T, Pedersen E, Lindsell C, Weinmaster G, Madsen OD, Serup P. Independent development of pancreatic alpha-and beta-cells from neurogenin3-expressing precursors: a role for the notch pathway in repression of premature differentiation. *Diabetes*. 2000 Feb;49(2):163–76.
  24. Desgraz R, Herrera PL. Pancreatic neurogenin 3-expressing cells are unipotent islet precursors. *Development*. 2009 Nov;136(21):3567–74.
  25. Trapnell C, Cacchiarelli D, Grimsby J, Pokharel P, Li S, Morse M, Lennon NJ, Livak KJ, Mikkelsen TS, Rinn JL. The dynamics and regulators of cell fate decisions are revealed by pseudotemporal ordering of single cells. *Nat Biotechnol*. 2014 Apr;32(4):381–6.
  26. Qiu X, Mao Q, Tang Y, Wang L, Chawla R, Pliner HA, Trapnell C. Reversed graph embedding resolves complex single-cell trajectories. *Nat Meth*. 2017 Oct;14(10):979–82.
  27. Qiu X, Hill A, Packer J, Lin D, Ma Y-A, Trapnell C. Single-cell mRNA quantification and differential analysis with Census. *Nat Meth*. 2017 Mar;14(3):309–15.
  28. Johansson KA, Dursun U, Jordan N, Gu G, Beermann F, Gradwohl G, Grapin-Botton A. Temporal Control of Neurogenin3 Activity in Pancreas Progenitors Reveals Competence Windows for the Generation of Different Endocrine Cell Types. *Developmental Cell*. 2007 Mar;12(3):457–65.
  29. Georgia S, Bhushan A. Beta cell replication is the primary mechanism for

- maintaining postnatal beta cell mass. *J Clin Invest.* 2004 Oct;114(7):963–8.
30. Puri S, Roy N, Russ HA, Leonhardt L, French EK, Roy R, Bengtsson H, Scott DK, Stewart A, Hebrok M. Replication confers beta cell immaturity. *Nat Comms.* Springer US; 2018 Feb 2;9(1):485.
  31. Szabat M, Page MM, Panzhinskiy E, Skovsø S, Mojibian M, Fernandez-Tajes J, Bruin JE, Bround MJ, Lee JT, Xu EE, Taghizadeh F, O'Dwyer S, van de Bunt M, Moon KM, Sinha S, Han J, Fan Y, Lynn FC, Trucco M, Borchers CH, Foster LJ, Nislow C, Kieffer TJ, Johnson JD. Reduced Insulin Production Relieves Endoplasmic Reticulum Stress and Induces  $\beta$  Cell Proliferation. *Cell Metabolism.* 2016 Jan 12;23(1):179–93.
  32. Krentz NAJ, Van Hoof D, Li Z, Watanabe A, Tang M, Nian C, German MS, Lynn FC. Phosphorylation of NEUROG3 Links Endocrine Differentiation to the Cell Cycle in Pancreatic Progenitors. *Developmental Cell.* 2017 Apr 24;41(2):129–142.e6.
  33. Rezanian A, Bruin JE, Arora P, Rubin A, Batushansky I, Asadi A, O'Dwyer S, Quiskamp N, Mojibian M, Albercht T, Yang YH, Johnson JD, Kieffer TJ. Reversal of diabetes with insulin-producing cells derived in vitro from human pluripotent stem cells. *Nat Biotechnol.* 2014 Nov;32(11):1121–33.
  34. Huang HP, Liu M, El-Hodiri HM, Chu K, Jamrich M, Tsai MJ. Regulation of the Pancreatic Islet-Specific Gene BETA2 (neuroD) by Neurogenin 3. *Mol Cell Biol.* 2000 May;20(9):3292–307.
  35. Arnes L, Hill JT, Gross S, Magnuson MA, Sussel L. Ghrelin Expression in the Mouse Pancreas Defines a Unique Multipotent Progenitor Population. *PLoS ONE.* 2012 Dec 12;7(12):e52026.
  36. Ohta Y, Kosaka Y, Kishimoto N, Wang J, Smith SB, Honig G, Kim H, Gasa RM, Neubauer N, Liou A, Tecott LH, Deneris ES, German MS. Convergence of the Insulin and Serotonin Programs in the Pancreatic Beta-Cell. *Diabetes.* 2011 Dec;60(12):3208–16.
  37. Suissa Y, Magenheimer J, Stolovich-Rain M, Hija A, Collombat P, Mansouri A, Sussel L, Sosa-Pineda B, McCracken K, Wells JM, Heller RS, Dor Y, Glaser B. Gastrin: A Distinct Fate of Neurogenin3 Positive Progenitor Cells in the Embryonic Pancreas. *PLoS ONE.* 2013 Aug 5;8(8):e70397–10.
  38. Zito E, Chin K-T, Blais J, Harding HP, Ron D. ERO1- $\beta$ , a pancreas-specific disulfide oxidase, promotes insulin biogenesis and glucose homeostasis. *J Cell Biol.* 2010 Mar 22;188(6):821–32.
  39. Davidson HW, Wenzlau JM, O'Brien RM. Zinc transporter 8 (ZnT8) and  $\beta$  cell function. *Trends in Endocrinology & Metabolism.* 2014 Aug;25(8):415–24.
  40. Whim MD. Pancreatic Beta Cells Synthesize Neuropeptide Y and Can Rapidly Release Peptide Co-Transmitters. *PLoS ONE.* 2011 Apr 29;6(4):e19478–10.
  41. Morris L, Graham CF, Gordon S. Macrophages in haemopoietic and other tissues of the developing mouse detected by the monoclonal antibody F4/80. *Development.* 1991 Jun;112(2):517–26.
  42. Gouon-Evans V, Rothenberg ME, Pollard JW. Postnatal mammary gland development requires macrophages and eosinophils. *Development.* 2000 Jun;127(11):2269–82.
  43. Henson PM, Hume DA. Apoptotic cell removal in development and tissue



- homeostasis. *Trends in Immunology*. 2006 May;27(5):244–50.
44. Condeelis J, Pollard JW. Macrophages: Obligate Partners for Tumor Cell Migration, Invasion, and Metastasis. *Cell*. 2006 Jan;124(2):263–6.
  45. Geutskens SB, Otonkoski T, Pulkkinen MA, Drexhage HA, Leenen PJ. Macrophages in the murine pancreas and their involvement in fetal endocrine development in vitro. *Journal of Leukocyte Biology*. 2005 Oct;78(4):845–52.
  46. Banaei-Bouchareb L, Gouon-Evans V, Samara-Boustani D, Castellotti MC, Czernichow P, Pollard JW, Polak M. Insulin cell mass is altered in Csf1op/Csf1op macrophage-deficient mice. *Journal of Leukocyte Biology*. 2004 Aug;76(2):359–67.
  47. Kaufmann LT, Gierl MS, Niehrs C. Gadd45a, Gadd45b and Gadd45g expression during mouse embryonic development. *Gene Expression Patterns*. 2011 Dec;11(8):465–70.
  48. la Calle-Mustienes de E, Glavic A, Modolell J, Gomez-Skarmeta JL. Xiro homeoproteins coordinate cell cycle exit and primary neuron formation by upregulating neuronal-fate repressors and downregulating the cell-cycle inhibitor XGadd45-gamma. *Mechanisms of Development*. 2002 Nov;119(1):69–80.
  49. Huang HS, Kubish GM, Redmond TM, Turner DL, Thompson RC, Murphy GG, Uhler MD. Direct transcriptional induction of Gadd45 $\gamma$  by Ascl1 during neuronal differentiation. *Mol Cell Neurosci*. 2010 Jul;44(3):282–96.
  50. Hildesheim J, Fornace AJ. Gadd45a: an elusive yet attractive candidate gene in pancreatic cancer. *Clinical Cancer Research*. 2002 Aug;8(8):2475–9.
  51. Zhan Q, Antinore MJ, Wang XW, Carrier F, Smith ML, Harris CC, Fornace AJ. Association with Cdc2 and inhibition of Cdc2/Cyclin B1 kinase activity by the p53-regulated protein Gadd45. *Oncogene*. 1999 May 6;18(18):2892–900.
  52. Kaufmann LT, Niehrs C. Gadd45a and Gadd45g regulate neural development and exit from pluripotency in *Xenopus*. *Mechanisms of Development*. 2011 Dec 1;128(7-10):401–11.
  53. Ma DK, Jang MH, Guo JU, Kitabatake Y, Chang ML, Pow-Anpongkul N, Flavell RA, Lu B, Ming GL, Song H. Neuronal Activity-Induced Gadd45b Promotes Epigenetic DNA Demethylation and Adult Neurogenesis. *Science*. 2009 Feb 20;323(5917):1074–7.
  54. Guardavaccaro D, Corrente G, Covone F, Micheli L, D'Agnano I, Starace G, Caruso M, Tirone F. Arrest of G1-S progression by the p53-inducible gene PC3 is Rb dependent and relies on the inhibition of cyclin D1 transcription. *Mol Cell Biol*. 2000 Mar;20(5):1797-1815.
  55. Canzoniere D, Farioli-Vecchioli S, Conti F, Ciotti MT, Tata AM, Augusti-Tocco G, Mattei E, Lakshmana MK, Krizhanovsky V, Reeves SA, Giovannoni R, Castano F, Servadio A, Ben-Arie N, Tirone F. Dual control of neurogenesis by PC3 through cell cycle inhibition and induction of Math1. *Journal of Neuroscience*. 2004 Mar 31;24(13):3355–69.
  56. Farioli-Vecchioli S, Saraulli D, Costanzi M, Leonardi L, Cinà I, Micheli L, Nutini M, Longone P, Oh SP, Cestari V, Tirone F. Impaired Terminal Differentiation of Hippocampal Granule Neurons and Defective Contextual Memory in PC3/Tis21 Knockout Mice. *PLoS ONE*. 2009 Dec 17;4(12):e8339–19.
  57. Lyden D, Young AZ, Zagzag D, Yan W, Gerald W, O'Reilly R, Bader BL, Hynes

- RO, Zhuang Y, Manova K, Benezra R. Id1 and Id3 are required for neurogenesis, angiogenesis and vascularization of tumour xenografts. *Nature*. 1999 Oct 14;401(6754):670–7.
58. Martens GA, Motte E, Kramer G, Stange G, Gaarn LW, Hellemans K, Nielsen JH, Aerts JM, Ling Z, Pipeleers D. Functional characteristics of neonatal rat  $\beta$  cells with distinct markers. *Journal of Molecular Endocrinology*. 2013 Dec 19;52(1):11–28.
59. Jermendy A, Toschi E, Aye T, Koh A, Aguayo-Mazzucato C, Sharma A, Weir GC, Sgroi D, Bonner-Weir S. Rat neonatal beta cells lack the specialised metabolic phenotype of mature beta cells. *Diabetologia*. 2011 Mar;54(3):594–604.
60. Blum B, Hrvatin SSSA, Schuetz C, Bonal C, Rezanian A, Melton DA. Functional beta-cell maturation is marked by an increased glucose threshold and by expression of urocortin 3. *Nat Biotechnol*. 2012 Feb 26;30(3):261–4.
61. Rorsman P, Arkhammar P, Bokvist K, Hellerström C, Nilsson T, Welsh M, Berggren PO. Failure of glucose to elicit a normal secretory response in fetal pancreatic beta cells results from glucose insensitivity of the ATP-regulated K<sup>+</sup> channels. *Proc Natl Acad Sci U S A*. 1989 Jun;86(12):4505–9.
62. Bliss CR, Sharp GW. Glucose-induced insulin release in islets of young rats: time-dependent potentiation and effects of 2-bromostearate. *Am J Physiol*. 1992 Nov;263(5 Pt 1):E890–6.
63. Otonkoski T, Andersson S, Knip M, Simell O. Maturation of insulin response to glucose during human fetal and neonatal development. Studies with perfusion of pancreatic isletlike cell clusters. *Diabetes*. 1988 Mar;37(3):286–91.
64. Tremblay KD, Zaret KS. Distinct populations of endoderm cells converge to generate the embryonic liver bud and ventral foregut tissues. *Developmental Biology*. 2005 Apr;280(1):87–99.
65. Zaret KS, Watts J, Xu J, Wandzioch E, Smale ST, Sekiya T. Pioneer factors, genetic competence, and inductive signaling: programming liver and pancreas progenitors from the endoderm. *Cold Spring Harbor Symposia on Quantitative Biology*. 2008;73(0):119–26.
66. Muzumdar MD, Tasic B, Miyamichi K, Li L, Luo L. A global double-fluorescent Cre reporter mouse. *genesis*. 2007;45(9):593–605.
67. D'Amour KA, Agulnick AD, Eliazer S, Kelly OG, Kroon E, Baetge EE. Efficient differentiation of human embryonic stem cells to definitive endoderm. *Nat Biotechnol*. 2005 Oct 28;23(12):1534–41.
68. Schulz TC, Young HY, Agulnick AD, Babin MJ, Baetge EE, Bang AG, Bhoumik A, Cepa I, Cesario RM, Haakmeester C, Kadoya K, Kelly JR, Kerr J, Martinson LA, McLean AB, Moorman MA, Payne JK, Richardson M, Ross KG, Sherrer ES, Song X, Wilson AZ, Brandon EP, Green CE, Kroon EJ, Kelly OG, D'Amour KA, Robins AJ. A Scalable System for Production of Functional Pancreatic Progenitors from Human Embryonic Stem Cells. *PLoS ONE*. 2012;7(5):e37004.
69. McCarthy DJ, Campbell KR, Lun ATL, Wills QF. Scater: pre-processing, quality control, normalization and visualization of single-cell RNA-seq data in R. *Bioinformatics*. 2017 Apr 15;33(8):1179–86.
70. Butler A, Satija R. Integrated analysis of single cell transcriptomic data across conditions, technologies, and species. *bioRxiv*. 2017 Jul 18:1–18.





## Figures

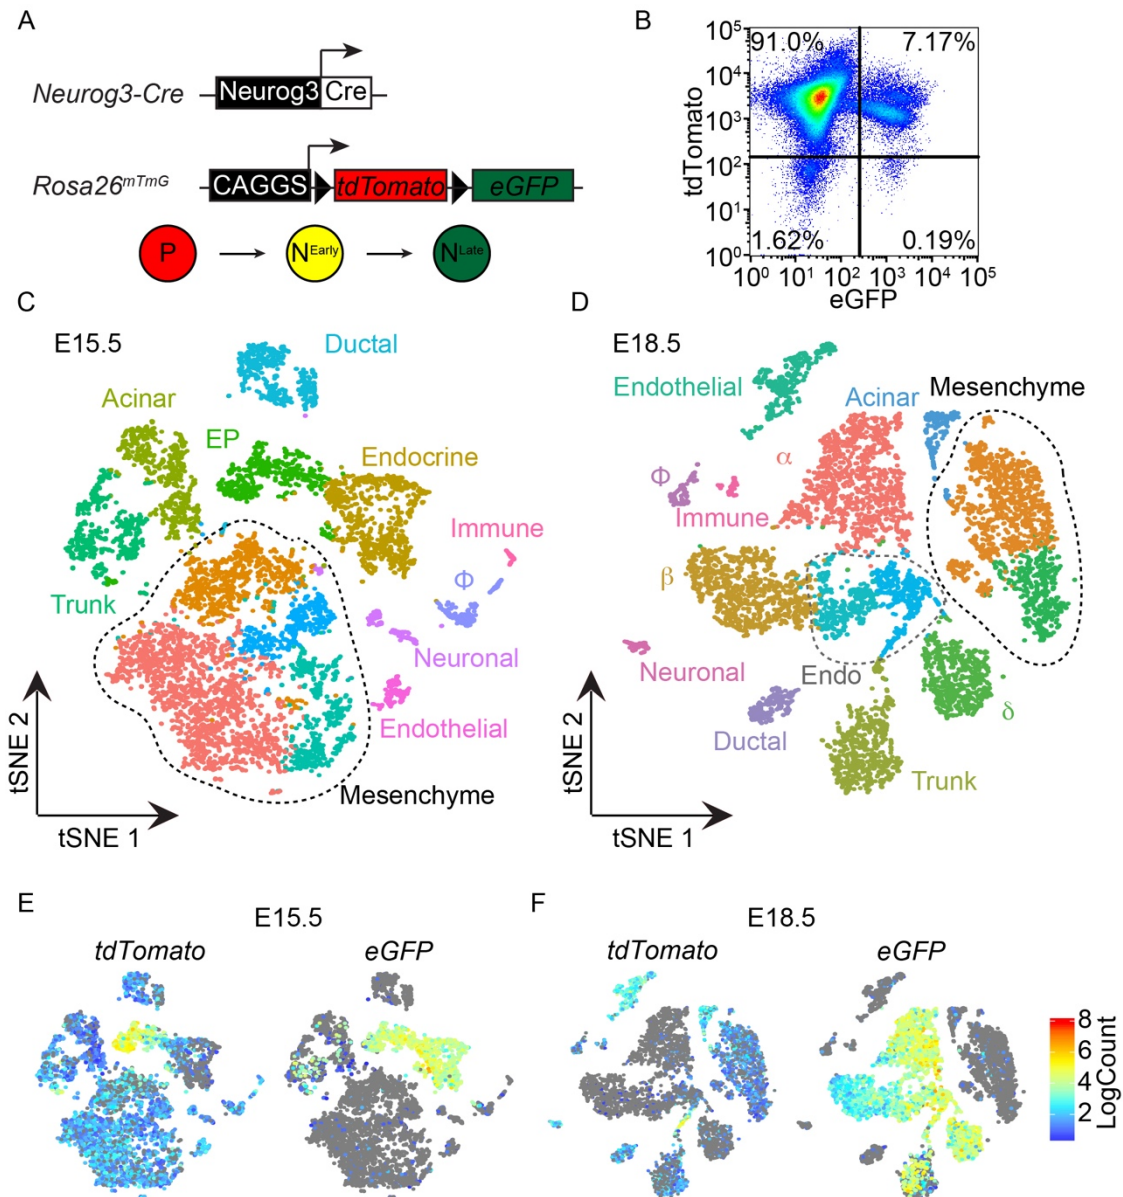

### Figure 1: Cell populations in E15.5 and E18.5 mouse pancreas

(A) Schematic overview of the two mouse lines used to isolate cell populations during pancreas development. Using this strategy, pancreatic progenitors (P; red) are tdTomato<sup>+</sup>, early Neurog3-lineage cells (N<sup>Early</sup>; yellow) are tdTomato<sup>+</sup> and eGFP<sup>+</sup>, and later Neurog3-lineage cells (N<sup>Late</sup>; green) are eGFP<sup>+</sup>. (B) FACS plot of E15.5 cells used for library generation. (C) Within the E15.5 pancreatic cells there were 13 clusters of nine cell types: trunk, acinar, endocrine progenitor (EP), ductal, endocrine, macrophage ( $\phi$ ), neuron, vasculature, and mesenchyme. (D) Within the E18.5 pancreatic cells there were 14 clusters of 11 cell types: trunk, acinar, ductal, maturing endocrine cells (Endo),  $\alpha$ -,  $\beta$ -,  $\delta$ -cells, macrophage ( $\phi$ ), neuron, vasculature, and mesenchyme. (E-F) Single cell gene expression of *tdTomato* and *eGFP* at (E) E15.5 and (F) E18.5.

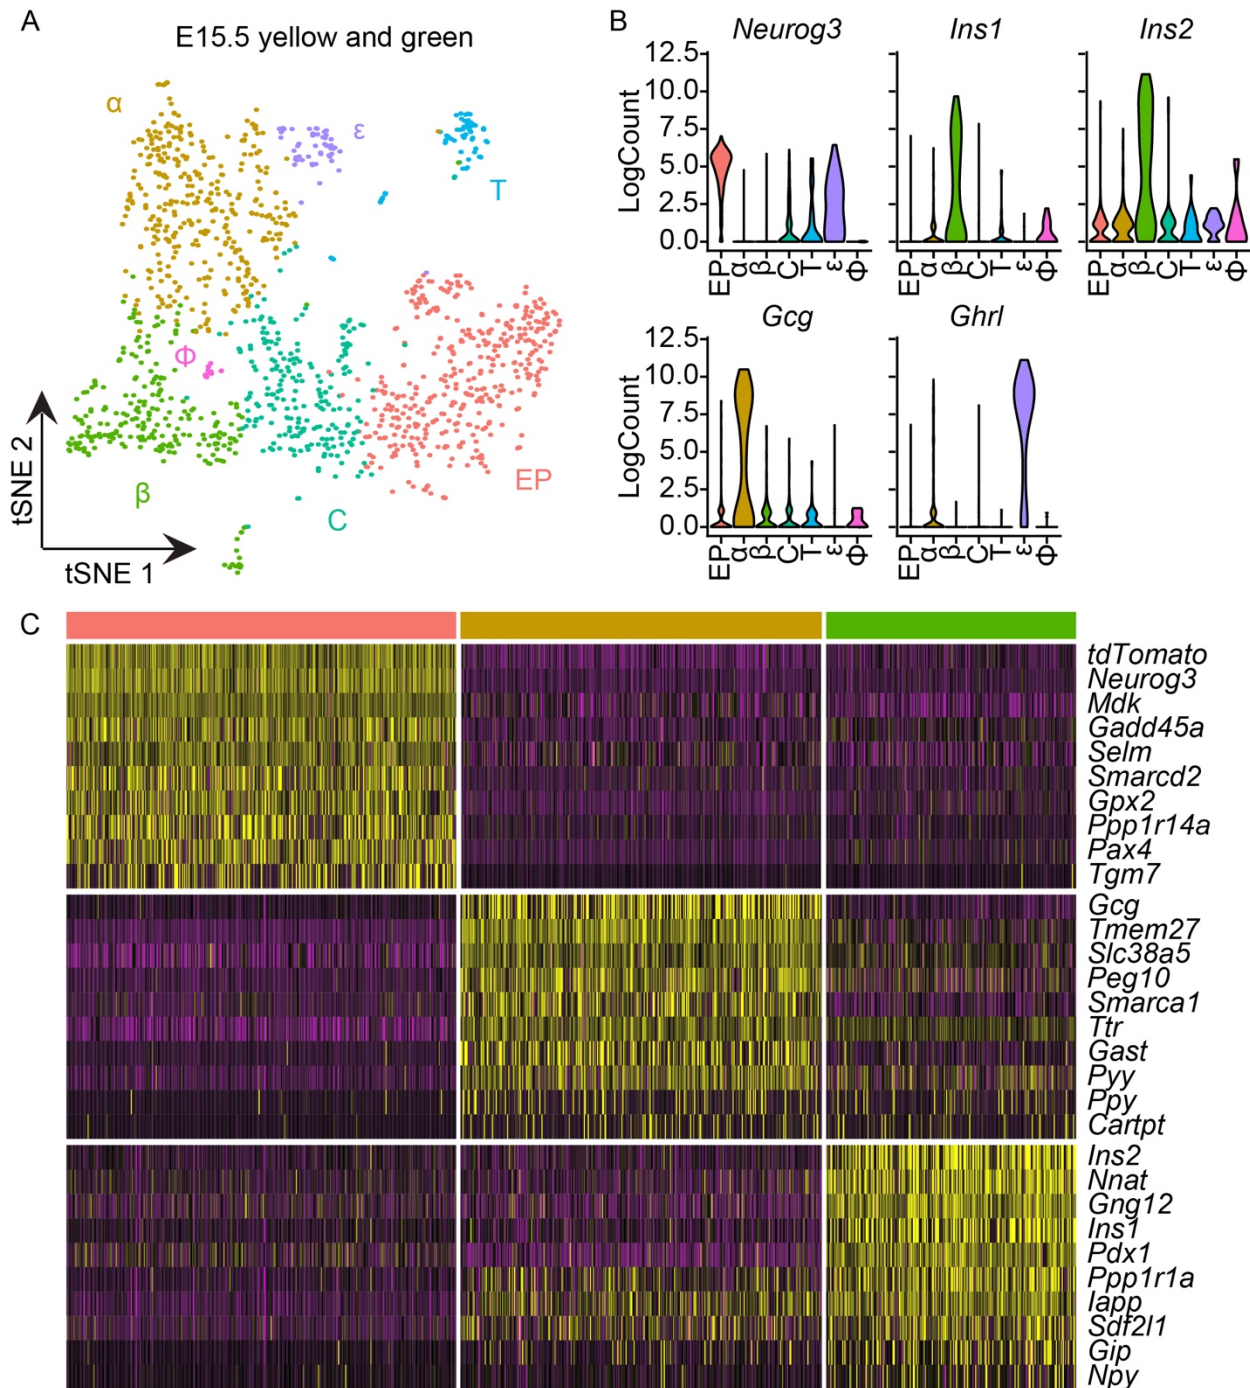

**Figure 2: Cell populations in mouse E15.5 yellow and green cells**

(A) Clustering of E15.5 yellow and green cells revealed seven clusters. These clusters were identified as endocrine progenitors (EP; 28.7%), *Chga*-expressing immature endocrine cells (C; 16.7%), alpha-cells ( $\alpha$ ; 26.4%),  $\beta$ -cells ( $\beta$ ; 18.4%), ghrelin-cells ( $\epsilon$ ; 3.9%), trunk cells (T; 4.7%), and macrophages ( $\phi$ ; 1.2%). (B) Single cell gene expression of *Neurog3*, *Ins1*, *Ins2*, *Gcg*, and *Ghrl* across cell clusters. (C) Heat map of the top ten differentially expressed genes in EP (pink),  $\alpha$ -cells (yellow), and  $\beta$ -cells (green) populations.

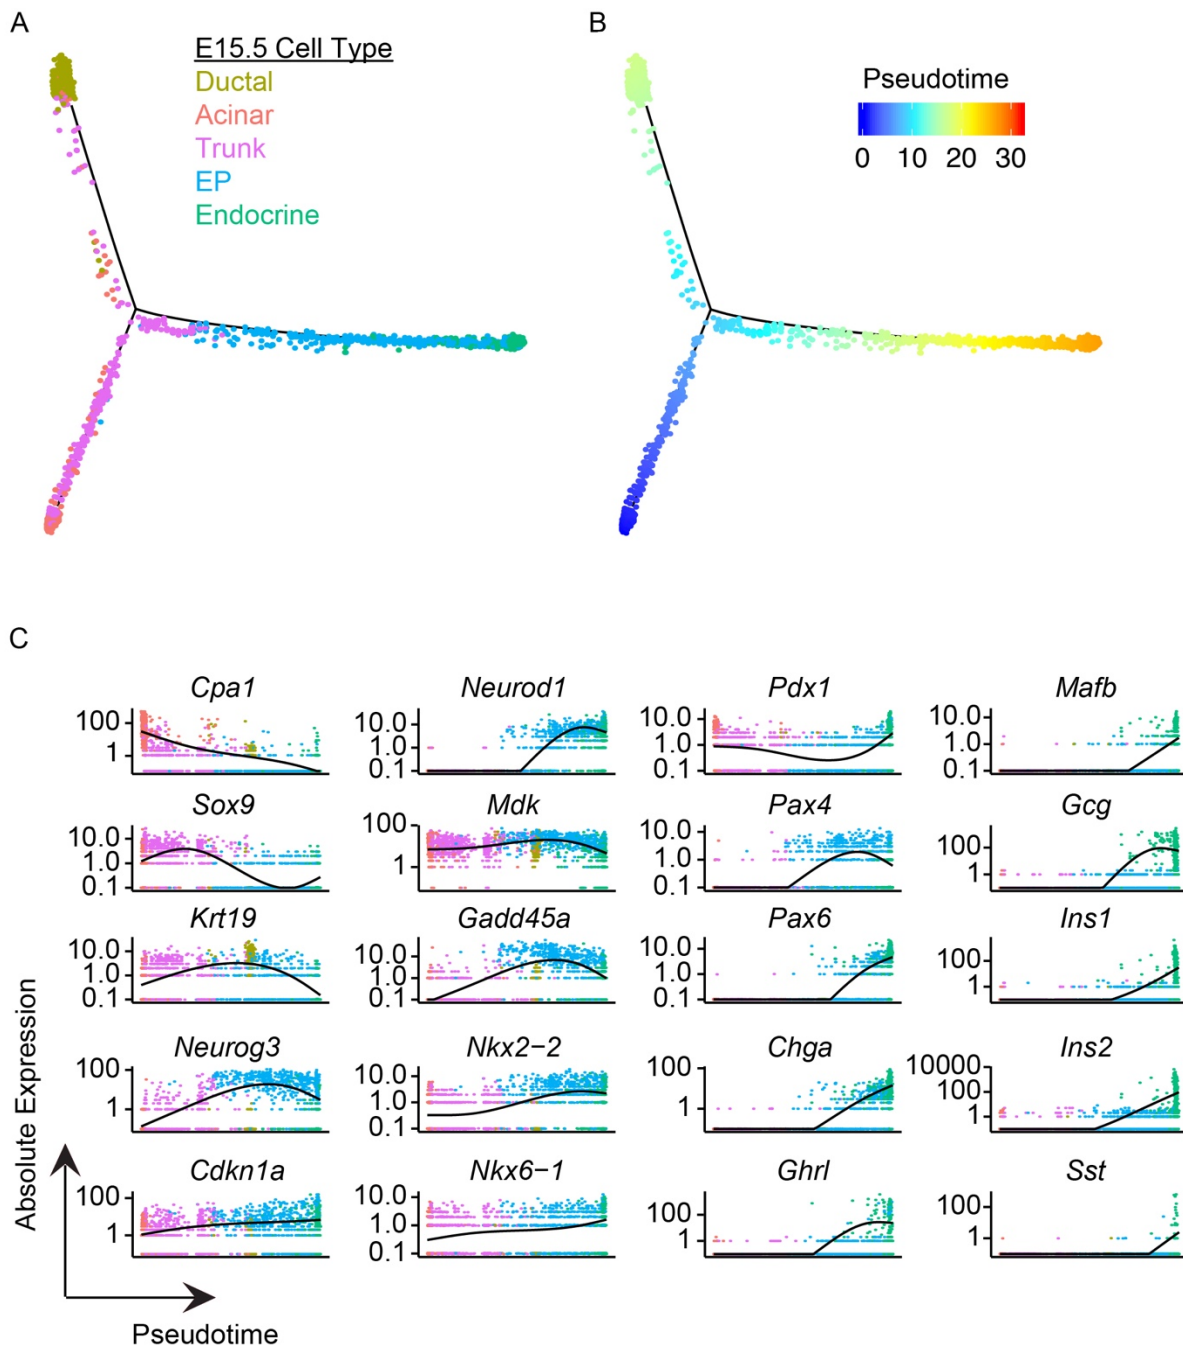

**Figure 3: Pseudotime analysis of E15.5 pancreatic cells**

(A) Minimal spanning tree for E15.5 ductal (yellow), acinar (red), trunk (purple), endocrine progenitor (EP; blue), and endocrine cells (green). For this analysis, the top 1000 highly variant genes were determined using Seurat and cell states were ordered by Monocle. (B) Pseudotime from 0 (blue) to 30 (red) orders trunk cells first, following by ductal and then the endocrine lineage. (C) Gene expression of cell-type specific markers during pseudotime: acinar markers *Cpa1*; ductal markers *Sox9* and *Krt19*; endocrine progenitor markers *Neurog3*, *Cdkn1a*, *Neurod1*, *Mdk*, and *Gadd45a*; pancreatic markers *Nkx2-2*, *Nkx6-1*, *Pdx1*, *Pax4*, and *Pax6*; and endocrine markers *Chga*, *Ghrl*, *Mafb*, *Gcg*, *Ins1*, *Ins2*, and *Sst*.



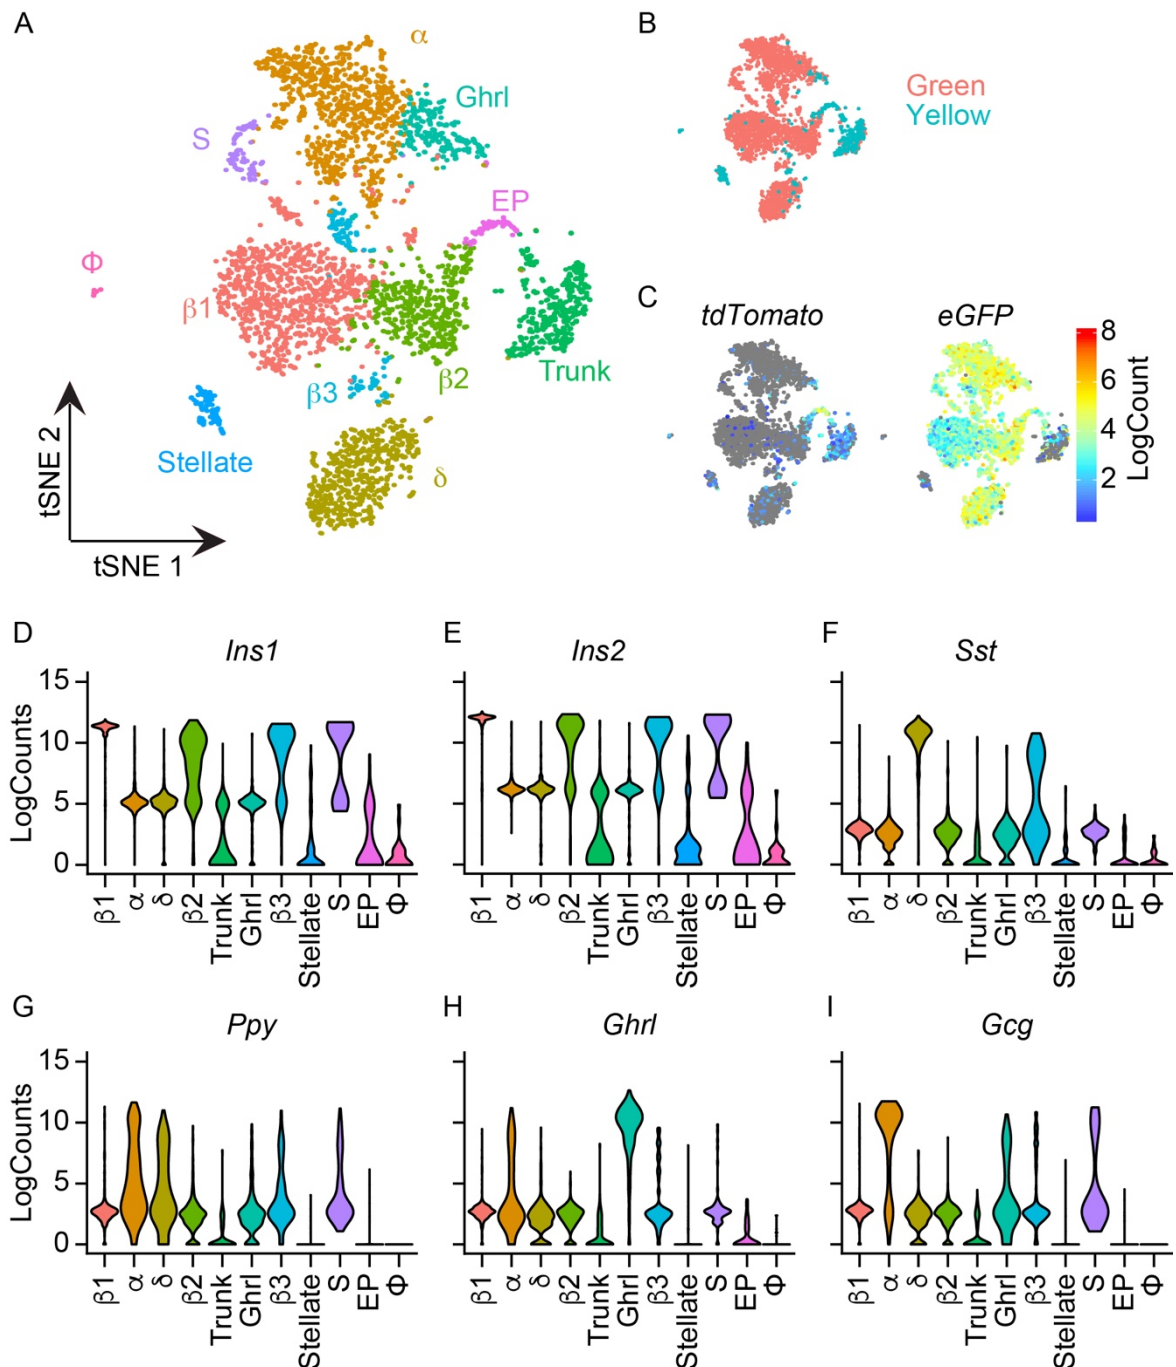

**Figure 4: Cell populations in E18.5 yellow and green cells**

(A) tSNE plot of 11 cell clusters from E18.5 yellow and green cells: alpha-cell ( $\alpha$ ), three  $\beta$ -cell ( $\beta 1$ ,  $\beta 2$ ,  $\beta 3$ ), delta-cell ( $\delta$ ), Ghrl-cell, S-phase cells (S), trunk, endocrine progenitor (EP), stellate, and macrophages ( $\phi$ ). (B) Library identity of single cells in tSNE plot. (C) Single cell expression of *tdTomato* and *eGFP*. (D-I) Expression of endocrine hormones (D) *Ins1*, (E) *Ins2*, (F) *Sst*, (G) *Ppy*, (H) *Ghrl*, and (I) *Gcg* across clusters.

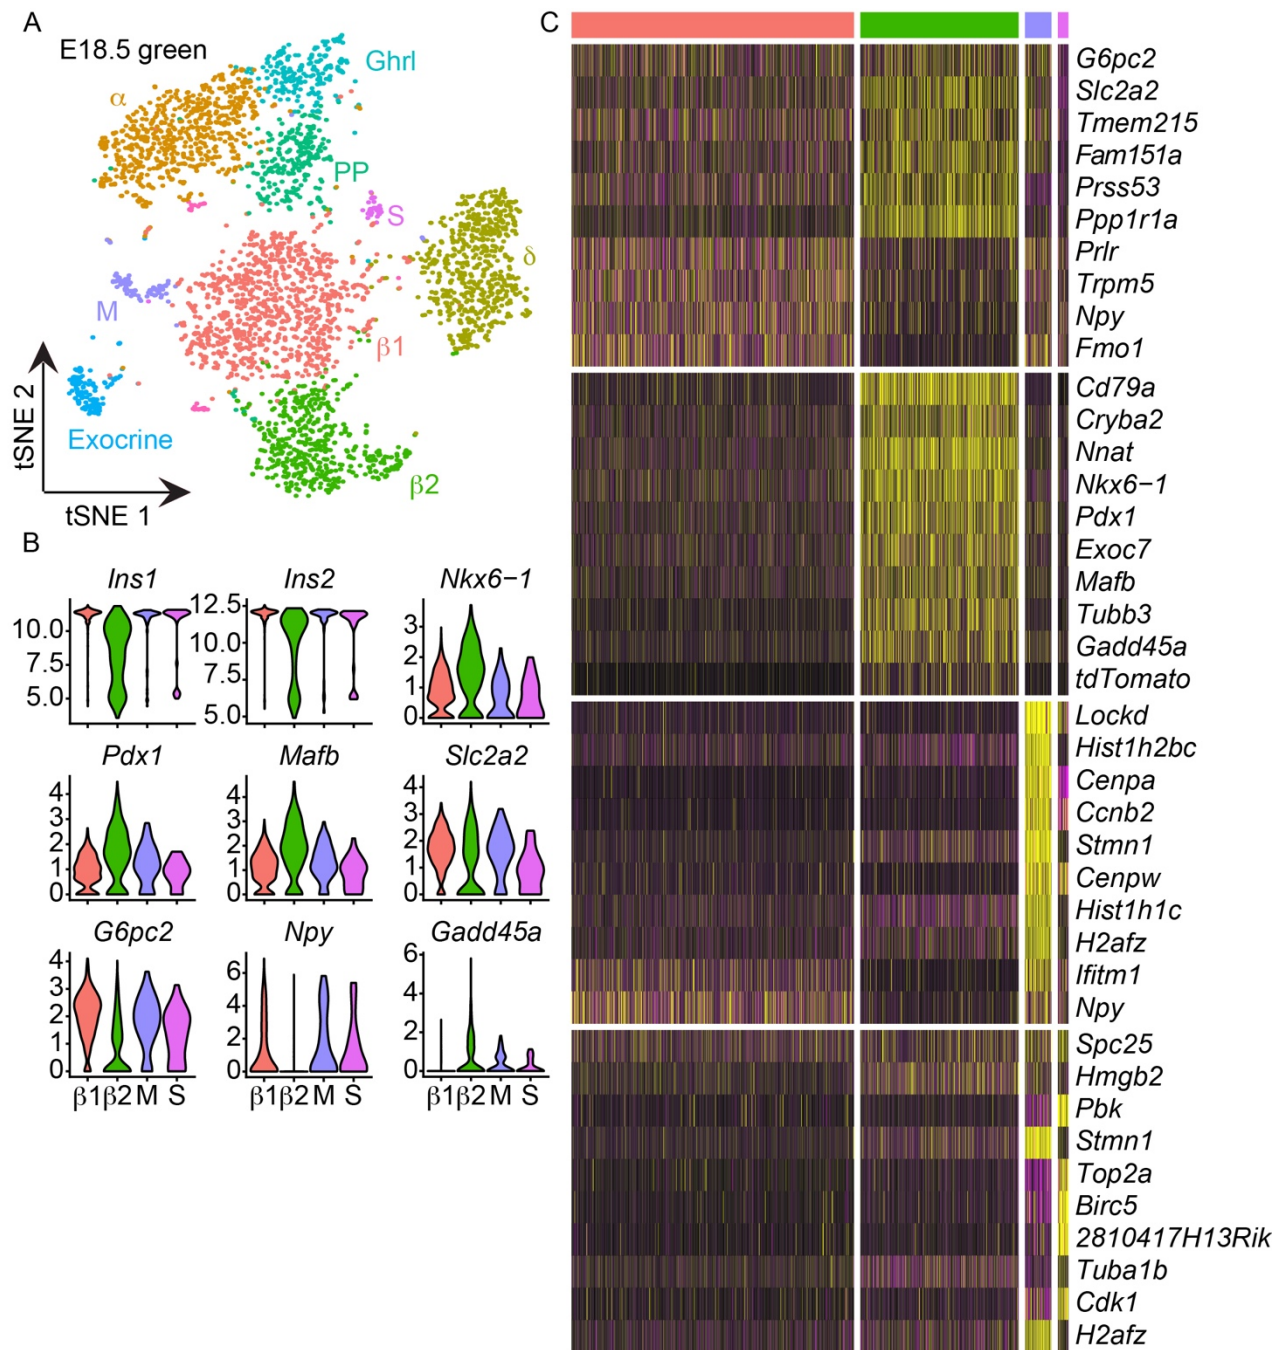

**Figure 5: Characterization of endocrine cells in E18.5 green cells**

(A) tSNE plot of 10 cell clusters from E18.5 green cells. (B) Violin plots of average gene expression of *Ins1*, *Ins2*, *Nkx6-1*, *Pdx1*, *Mafb*, *Slc2a2*, *G6pc2*, *Npy*, and *Gadd45a* in β1 (red), β2 (green), M (purple), and S (pink). (C) Top ten differentially expressed genes in the β-cell clusters: β1 (red), β2 (green), S (pink), and M (purple).

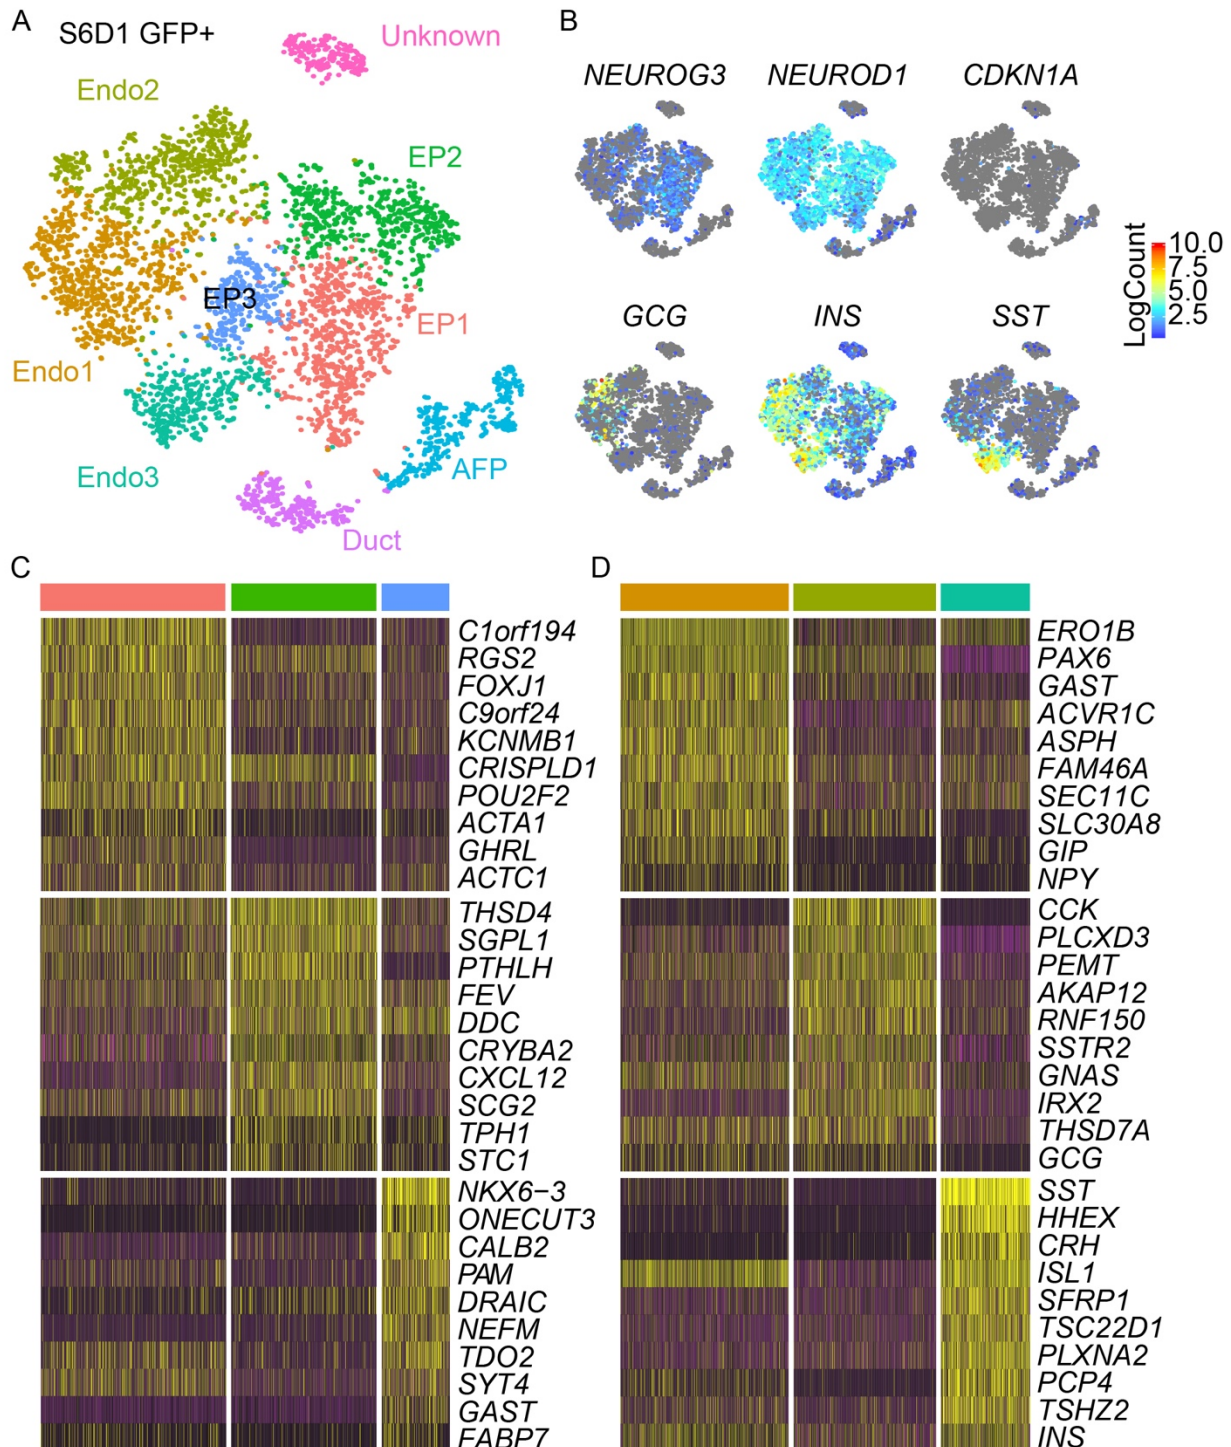

**Figure 6: Characterization of NEUROG3-eGFP S6D1 cells**

(A) tSNE plot of 9 cell clusters from S6D1 GFP+. (B) Single cell gene expression of NEUROG3, NEUROD1, CDKN1A, GCG, INS, and SST. (C) Top ten differentially expressed genes in the endocrine progenitor (EP) cell clusters: EP1 (red), EP2 (green), and EP3 (blue). (D) Top ten differentially expressed genes in endocrine cell clusters: Endo1 (yellow), Endo2 (green), and Endo3 (blue).



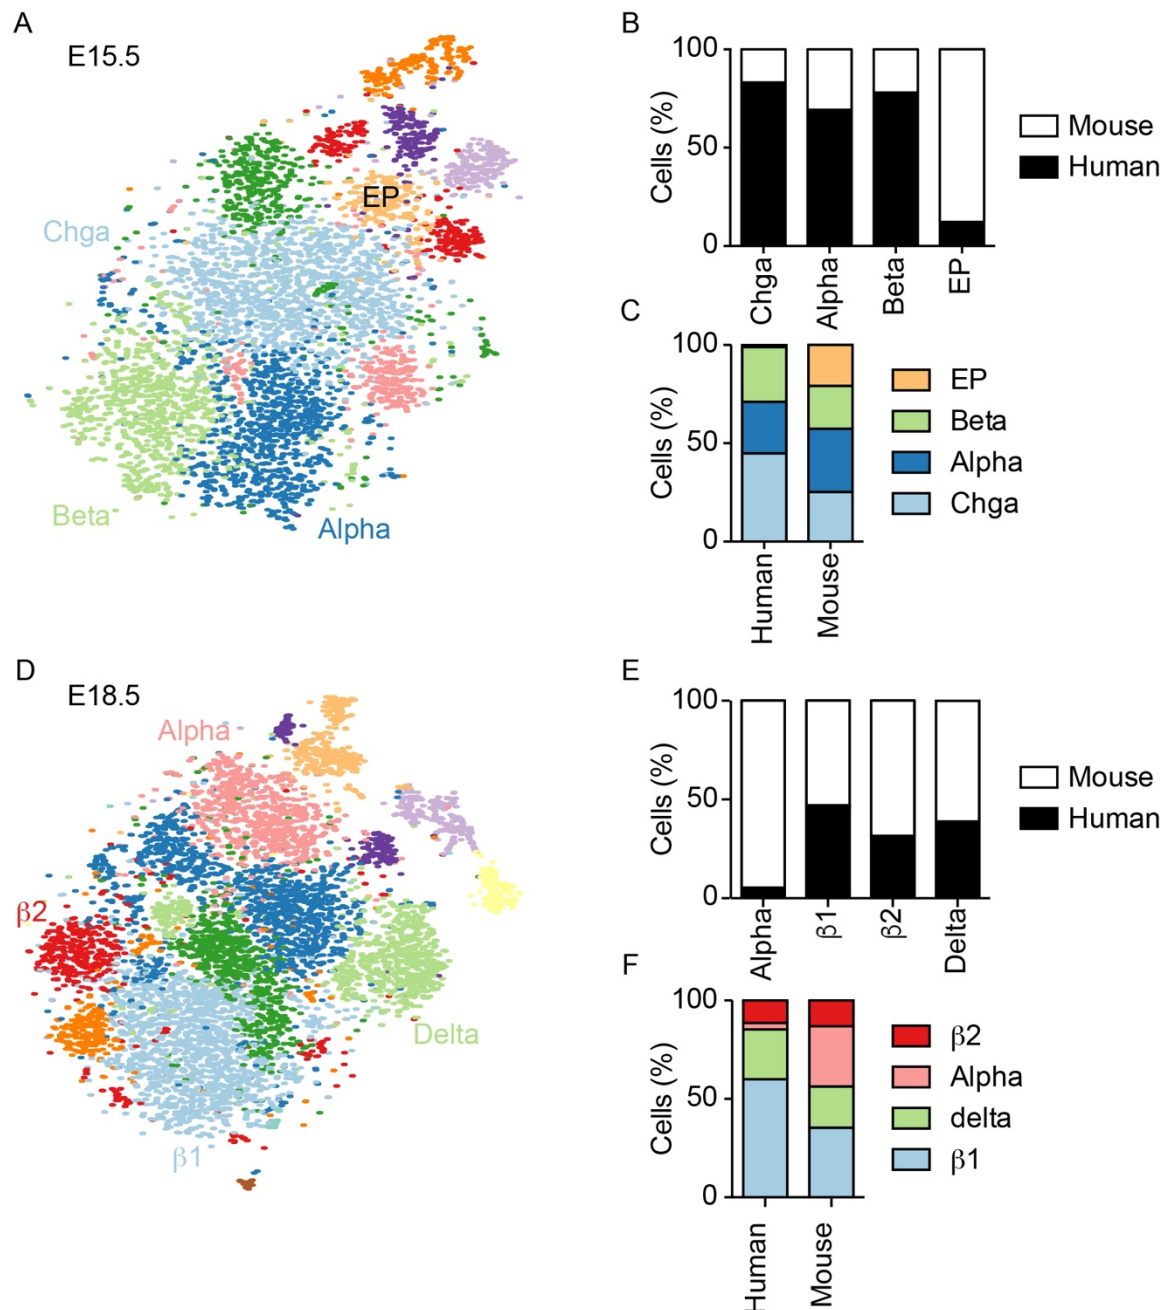

**Figure 7: Comparison of hESC-derived endocrine cells to mouse E15.5 and E18.5 endocrine cells**

(A) tSNE plot of 10 cell clusters from comparison of E15.5 yellow & green and S6D1 libraries. (B) Proportion (%) of Chga, Alpha, Beta and EP clusters that are from the mouse (white) and human (black) libraries. (C) Of the total human and mouse populations, the percentage of cells that are classified as EP, Beta, Alpha and Chga phenotype. (D) tSNE plot of 13 cell clusters from comparison of E18.5 green and S6D1 libraries. (E) Proportion (%) of Alpha, beta1, beta2, and Delta clusters that are from the mouse (white) and human (black) libraries. (F) Of the total human and mouse populations, the percentages of cell that are classified as beta2, Alpha, Delta, and beta1 phenotype.



## Tables

|                            | E15.5<br>Aggr | E15.5<br>Red | E15.5<br>Yellow<br>Green | E18.5<br>Aggr | E18.5<br>Red | E18.5<br>Yellow | E18.5<br>Green | S6D1<br>GFP |
|----------------------------|---------------|--------------|--------------------------|---------------|--------------|-----------------|----------------|-------------|
| Pre-<br>filtered<br>Cells  | 7482          | 6010         | 1492                     | 7012          | 2846         | 600             | 3577           | 4995        |
| Post-<br>filtered<br>Cells | 7223          | 5834         | 1350                     | 6852          | 2712         | 593             | 3516           | 4497        |

**Table 1: Number of cells pre- and post-filtering for each individual library.**

## Supplemental Information titles and legends

### **Figure S1: Top ten differentially expressed genes in trunk and endocrine cell populations at E15.5 and E18.5, related to Figure 1.**

(A) Single cell expression of top ten differentially expressed genes in trunk (green), endocrine progenitors (EP; light green), and endocrine cells (yellow) at E15.5. (B) Single cell expression of top ten differentially expressed genes in trunk (green) and two immature endocrine clusters (blue and teal) at E18.5.

### **Figure S2: Characterization of mouse E15.5 yellow and green cells, related to Figure 2.**

(A) tSNE plot identifying cell cycle phase of individual cells in E15.5 yellow and green population. G1-phase in red, S-phase in blue and G2/M-phase in green. (B) Single cell gene expression of *Neurog3*, *Neurod1*, *Gcg*, *Ghrl*, *Ins1*, and *Ins2*. (C) Heatmap of top ten differentially expressed genes in Chga (green), trunk (blue), Ghrl (purple), and Macrophage (pink) clusters. (D) Single cell gene expression of *tdTomato*, *eGFP* and trunk cluster specific genes (*Spp1*, *Cxcl12*, *Cyr61*, *Mt1*, *Mt2*, *Cpa1*, and *Cpa2*).

### **Figure S3: Analysis of lineage specified trunk progenitor cells at E15.5, related to Figure 3.**

(A) Heatmap of top ten genes expressed in the trunk cells along the acinar, ductal and endocrine lineage.

### **Figure S4: Differentially expressed genes in E18.5 endocrine cell clusters, related to Figure 4.**

(A) Heatmap of top ten genes expressed in  $\beta$ 1 (red),  $\beta$ 2 (green),  $\beta$ 3 (blue), and S-phase (purple) clusters in E18.5 green cells. (B) Heatmap of top ten genes expressed in trunk (green) and endocrine progenitor (EP; pink) clusters in E18.5 green cells.

### **Figure S5: Differentially expressed genes in E18.5 green non- $\beta$ -cell endocrine clusters, related to Figure 5.**

(A) tSNE plot of individual cell cycle phase of E18.5 green cells. (B) Single cell gene expression of endocrine hormones *Ins1*, *Ins2*, *Ppy*, *Gcg*, *Sst*, and *Ghrl*. (C) Heatmap of top ten differentially expressed genes in  $\alpha$ -cells (orange),  $\delta$ -cells (yellow), PP-cells (green), and Ghrl cells (blue).

## Supplementary Tables

### **Table S1: Differential Expression Analysis of E15.5 mouse pancreatic cells.**

Related to Figure 1. Lists of genes that are differentially expressed in each cluster of E15.5 total pancreatic cells. Within the excel file, each cluster has its own sheet where the differentially expressed genes are listed in descending order by average differential expression and includes relevant p value.

### **Table S2: Differential Expression Analysis of E18.5 mouse pancreatic cells.**

Related to Figure 1. Differentially expressed gene lists for each cluster of E18.5 total pancreatic cells. The differentially expressed genes per cluster (individual sheets within excel file) are listed in descending order based on average differential expression.

### **Table S3: Differential Expression Analysis of E15.5 endocrine-lineage cells.**

Related to Figure 2. Differentially expressed gene lists for each cluster of E15.5 yellow and green cells. The differentially expressed genes per cluster (individual sheets within excel file) are listed in descending order based on average differential expression.

### **Table S4: Differential Expression Analysis of E18.5 endocrine-lineage cells.**

Related to Figure 4. Lists of genes that are differentially expressed in each cluster of E18.5 yellow and green cells. Within the excel file, each cluster has its own sheet where the differentially expressed genes are listed in descending order by average differential expression and includes relevant p value.

### **Table S5: Differential Expression Analysis of E18.5 endocrine cells.**

Related to Figure 5. Lists of genes that are differentially expressed in each cluster of E18.5 green cells. Within the excel file, each cluster has its own sheet where the differentially expressed genes are listed in descending order by average differential expression and includes relevant p value.
